# Supplementary material
Source: Research Square preprint supplement (doi:10.21203/rs.3.rs-8591046/v1)
Supplement: Supplementary file 1 [file 09e8fe647545300428cdc40e.xlsx]

## Sheet: Sheet1
Phage library/Reference phages	Phage	Figure(s)	Accession ID	Source
Reference phages	T3	6	NCBI : NC_003298.1	American Type Culture Collection (ATCC 11303-B3)
	T4	6	NCBI : NC_000866.4	American Type Culture Collection (ATCC 11303-B4)
	T6	6	NCBI : NC_005363.1	American Type Culture Collection (ATCC 11303-B6)
	T7	6	NCBI : NC_001604.1	American Type Culture Collection (ATCC 11303-B7)
E. coli phage library	λ cI857	2, 3, 4, 5, S4, S5, S6, S7, S8	NCBI : NC_001416.1	cI857 mutant of bacteriophage lambda (ATCC 23724-B2)
	p240069	3, 5, S4, S5, S6, S7, S8	NMDC: RCIP1230	Ming Li's Laboratory at the Institute of Microbiology CAS
	p25005	2, 3, 5, S4, S5, S6, S7, S8	NMDC: RCIP1231	Ming Li's Laboratory at the Institute of Microbiology CAS
	pEcN-W26	2, 3, 5, S4, S5, S6, S7, S8	NMDC: RCIP1223	Ming Li's Laboratory at the Institute of Microbiology CAS
	pEcN-W22	3, 5, S4, S5, S6, S7, S8	NMDC: RCIP1225	Ming Li's Laboratory at the Institute of Microbiology CAS
	p2E	3, 5, S4, S5, S6, S7, S8	NMDC: RCIP1226	Guangxin Luan’s Lab (Chengdu Medical College)
	pEc9-1	3, 5, S4, S5, S6, S7, S8	NMDC: RCIP1228	Guangxin Luan’s Lab (Chengdu Medical College)
	PhiX174	3, 5, S4, S5, S6, S7, S8	NCBI : NC_001422.1	Ming Li's Laboratory at the Institute of Microbiology CAS
A. baumannii phage library	pAb32M12	5, S9, S10, S11, S12	NMDC: RCIP1246	Ming Li's Laboratory at the Institute of Microbiology CAS
	pAb22W22	5, S2, S9, S10, S11, S12	NMDC: RCIP1241	Ming Li's Laboratory at the Institute of Microbiology CAS
	pAb22W16	5, S9, S10, S11, S12	NMDC: RCIP1212	Ming Li's Laboratory at the Institute of Microbiology CAS
	pAb111W73	5, S9, S10, S11, S12	NMDC: RCIP1292	Ming Li's Laboratory at the Institute of Microbiology CAS
	pAb23M12	5, S9, S10, S11, S12	NMDC: RCIP1242	Ming Li's Laboratory at the Institute of Microbiology CAS
	pAb70M26	5, S9, S10, S11, S12	NMDC: RCIP1276	Ming Li's Laboratory at the Institute of Microbiology CAS
	pAb33M5	5, S9, S10, S11, S12	NMDC: RCIP1259	Ming Li's Laboratory at the Institute of Microbiology CAS
	pAb60W21	5, S9, S10, S11, S12	NMDC: RCIP1271	Ming Li's Laboratory at the Institute of Microbiology CAS
K. pneumoniae phage library	pKp03W3	5, S13, S14, S15, S16	NMDC: RCIP1218	Ming Li's Laboratory at the Institute of Microbiology CAS
	pKp04W8-1	5, S2, S13, S14, S15, S16	NMDC: RCIP1219	Ming Li's Laboratory at the Institute of Microbiology CAS
	pKp04W14	5, S13, S14, S15, S16	NMDC: RCIP1217	Ming Li's Laboratory at the Institute of Microbiology CAS
	pKp05W8	5, S13, S14, S15, S16	NMDC: RCIP1220	Ming Li's Laboratory at the Institute of Microbiology CAS
	pKp08W2	5, S13, S14, S15, S16	NMDC: RCIP1221	Ming Li's Laboratory at the Institute of Microbiology CAS
	pKp08W3	5, S13, S14, S15, S16	NMDC: RCIP1222	Ming Li's Laboratory at the Institute of Microbiology CAS
	pKp08W9	5, S13, S14, S15, S16	NMDC: RCIP1224	Ming Li's Laboratory at the Institute of Microbiology CAS
	pKp09W9	5, S13, S14, S15, S16	NMDC: RCIP1227	Ming Li's Laboratory at the Institute of Microbiology CAS
