# Supplementary material
Source: Research Square preprint supplement (doi:10.21203/rs.3.rs-8591046/v1)
Supplement: Supplementary file 1 [file a39a7fb0595400a29eac4665.docx]

**Supplementary Information for**

# Rapid and quantitative analysis of bacteriophage infectivity via fully-automated droplet digital PCR

# Yanfei Liu1,2, Huiwei Zhao2,3,*, Xinyue Cao3,6, Shize Jiang2, Jun Fu5, Junjing Xue2,6, Caiming Li7, Zhangrun Xu1,*, Ming Li2,3,6,*, Wenbin Du2,4,6,*

1 Research Center for Analytical Sciences, Department of Chemistry, College of Sciences, Northeastern University, Shenyang, Liaoning 110819, China

2 State Key Laboratory of Microbial Diversity and Innovative Utilization, Institute of Microbiology, Chinese Academy of Sciences, Beijing 100101, China

3 Department of Microbial Physiological & Metabolic Engineering, Institute of Microbiology, Chinese Academy of Sciences, Beijing 100101, China

4 China General Microbiological Culture Collection Center, Institute of Microbiology, Chinese Academy of Sciences, Beijing 100101, China

5 Maccura Biotechnology Co., Ltd Chengdu 611730, China

6 College of Life Sciences and Medical School, University of Chinese Academy of Sciences, Beijing 100049, China

7 Institute for Health Innovation and Technology (iHealthtech), National University of Singapore, Singapore 117599, Singapore

***e-mail:** zhaohw@im.ac.cn; [xuzr@mail.neu.edu.cn](mailto:xuzr@mail.neu.edu.cn); [lim_im@im.ac.cn](C:\\Users\\Administrator\\xwechat_files\\wxid_ukrk6ceklax821_0f3c\\msg\\file\\2025-12\\lim_im@im.ac.cn); [wenbin@im.ac.cn](C:\\Users\\Administrator\\xwechat_files\\wxid_ukrk6ceklax821_0f3c\\msg\\file\\2025-12\\wenbin@im.ac.cn)

**Table of Contents**

**Supplementary Figures S1-S16.**

**Supplementary Tables S1-S2.**


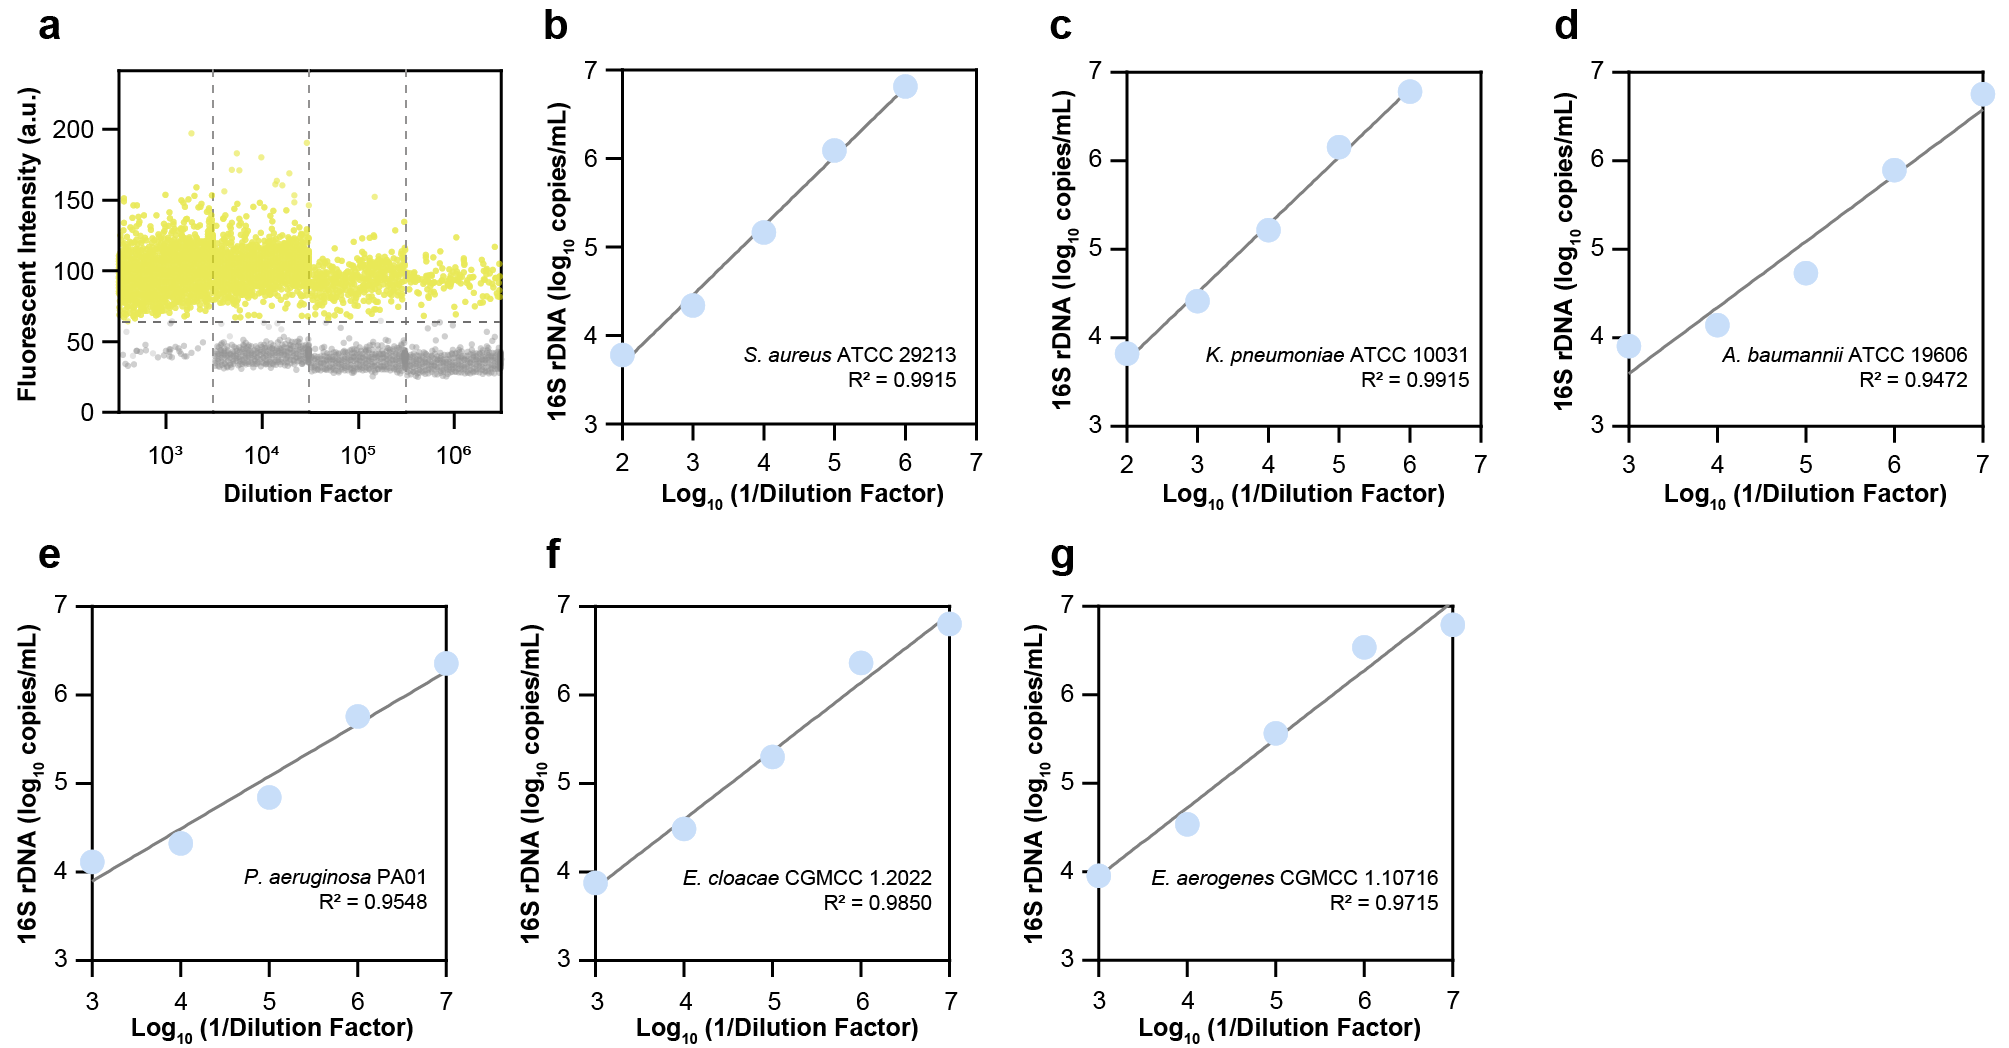


**Supplementary Fig. 1. Linearity of the universal ddPCR assay across ESKAPE reference strains. a,** Representative 1D fluorescence amplitude plot of *E. coli* MG1655 genomic DNA serially diluted 10-fold, demonstrating clear separation between positive (yellow) and negative (grey) droplets. **b–g,** Linear regression analyses comparing dilution factors against measured 16*S* rRNA gene copy numbers for representative ESKAPE pathogens: *S. aureus* ATCC29213 (**b**), *K. pneumoniae* ATCC10031 (**c**), *A. baumannii* ATCC19606 (**d**), *P. aeruginosa* PAO1 (**e**), *E. cloacae* CGMCC1.2022 (**f**), and *E. aerogenes* CGMCC1.10716 (**g**). The high coefficient of determination (R2) values displayed in each panel confirm the assay’s robust linearity and consistent performance across diverse bacterial species.


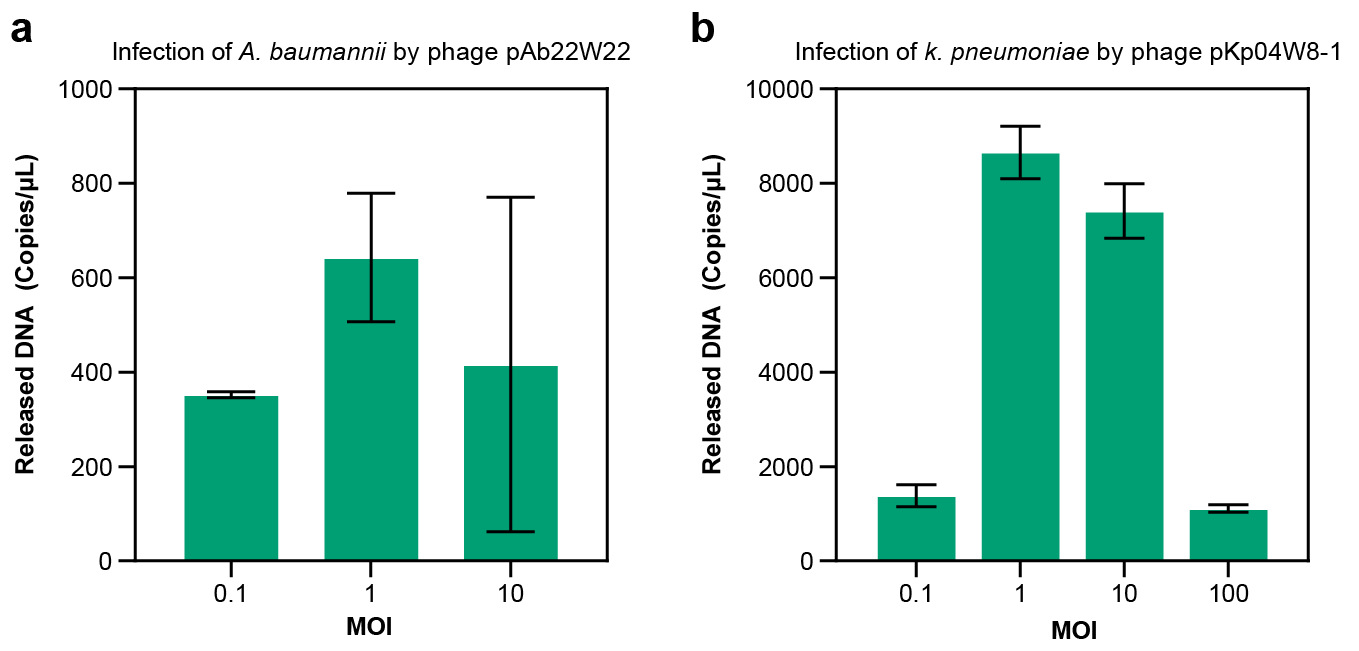


**Supplementary Fig. 2. Optimization of Multiplicity of Infection (MOI) for dPST of *Acinetobacter baumannii* and *Klebsiella pneumoniae*.** Quantification of phage-induced 16*S* rRNA release across varying MOIs to determine optimal infection conditions. **a,** *A. baumannii* challenged with phage pAb22W22 at MOIs of 0.1, 1, and 10. **b,** *K. pneumoniae* challenged with phage pKp04W8-1 at MOIs ranging from 0.1 to 100. In both phage–host models, an MOI of 1 yielded the maximal genomic DNA release, establishing it as the standard condition for subsequent assays. Error bars represent the standard deviation of replicates (*n* **≥ 3**).


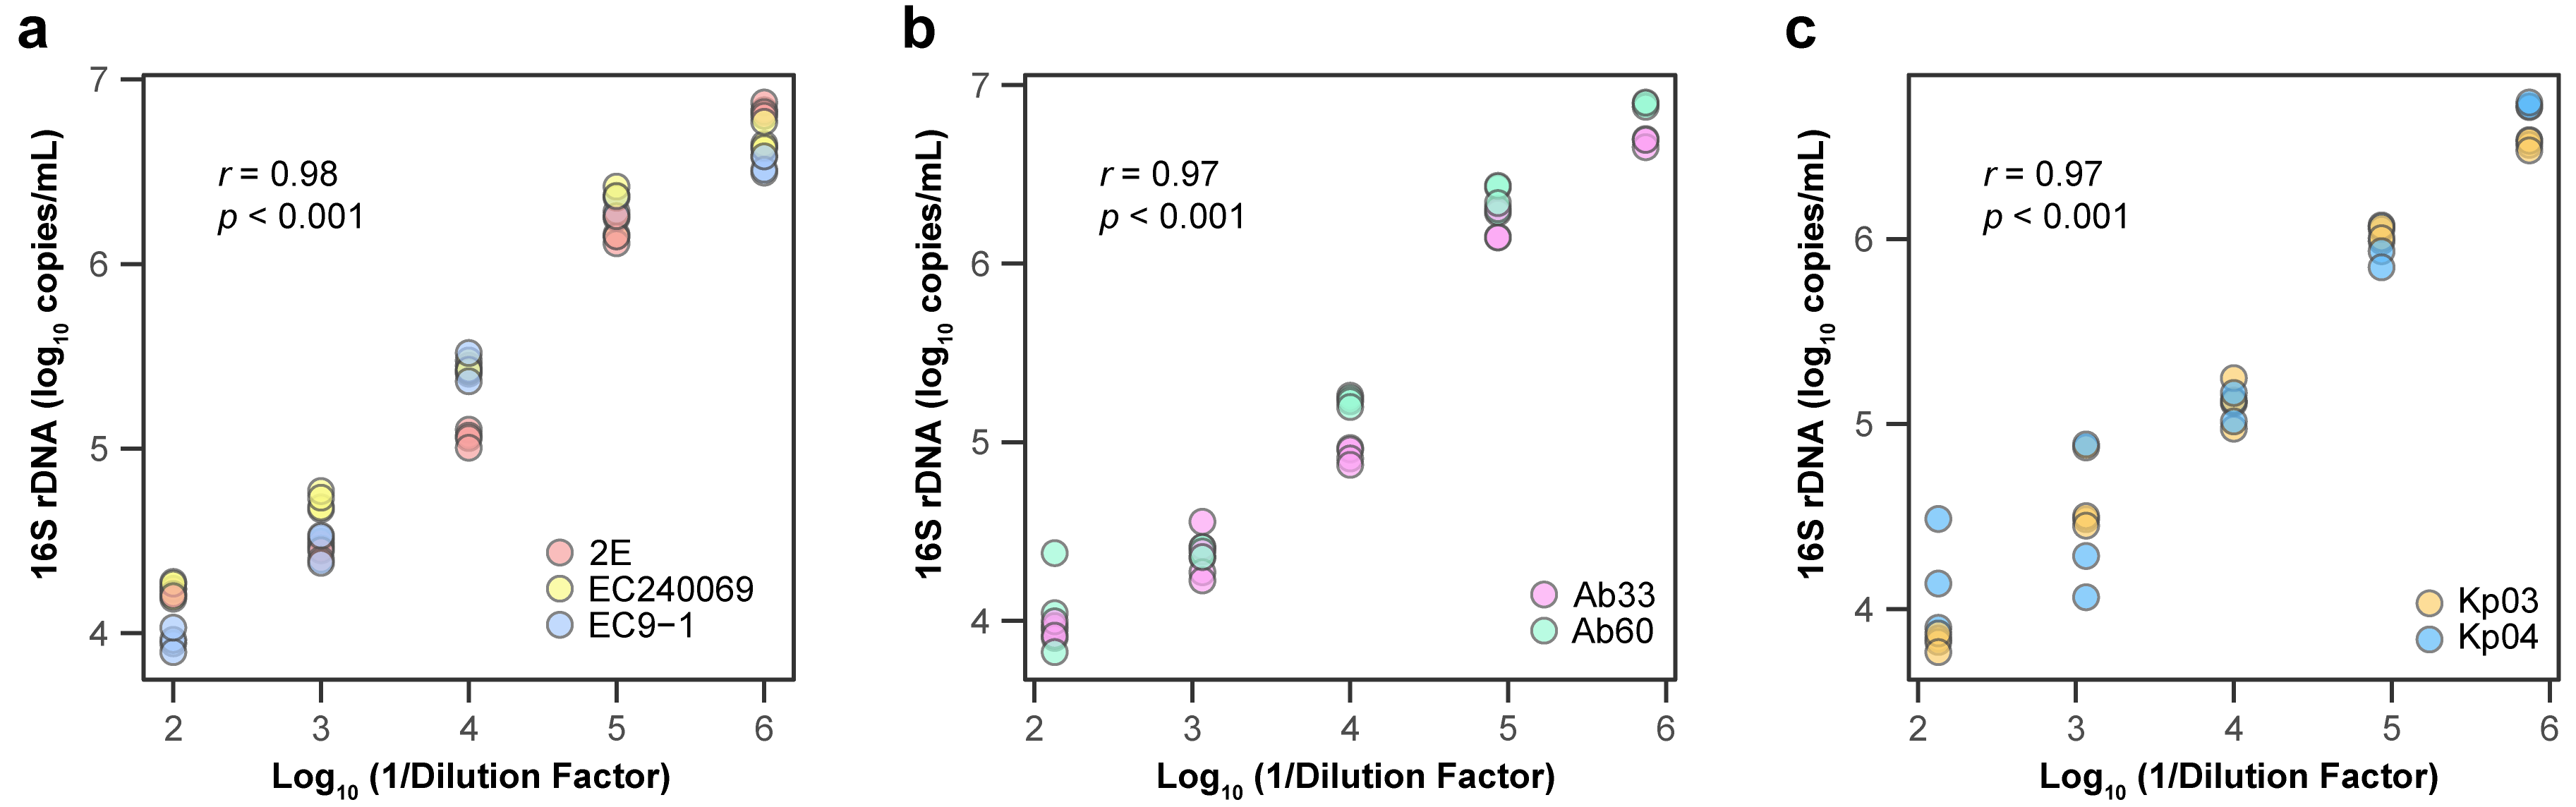


**Supplementary Fig. 3. Linearity of 16S rRNA quantification across representative clinical isolates.** Linear regression analysis comparing serial dilution factors against ddPCR-measured 16S rRNA copy numbers for clinical isolates of **a,** *E. coli* (*n* = 3), **b,** *A. baumannii* (*n* = 2), and **c,** *K. pneumoniae* (*n* = 2). The high coefficient of determination (*r*) and statistical significance (*p* < 0.001) displayed in each panel confirm the assay’s robust linear performance across diverse clinical isolates.


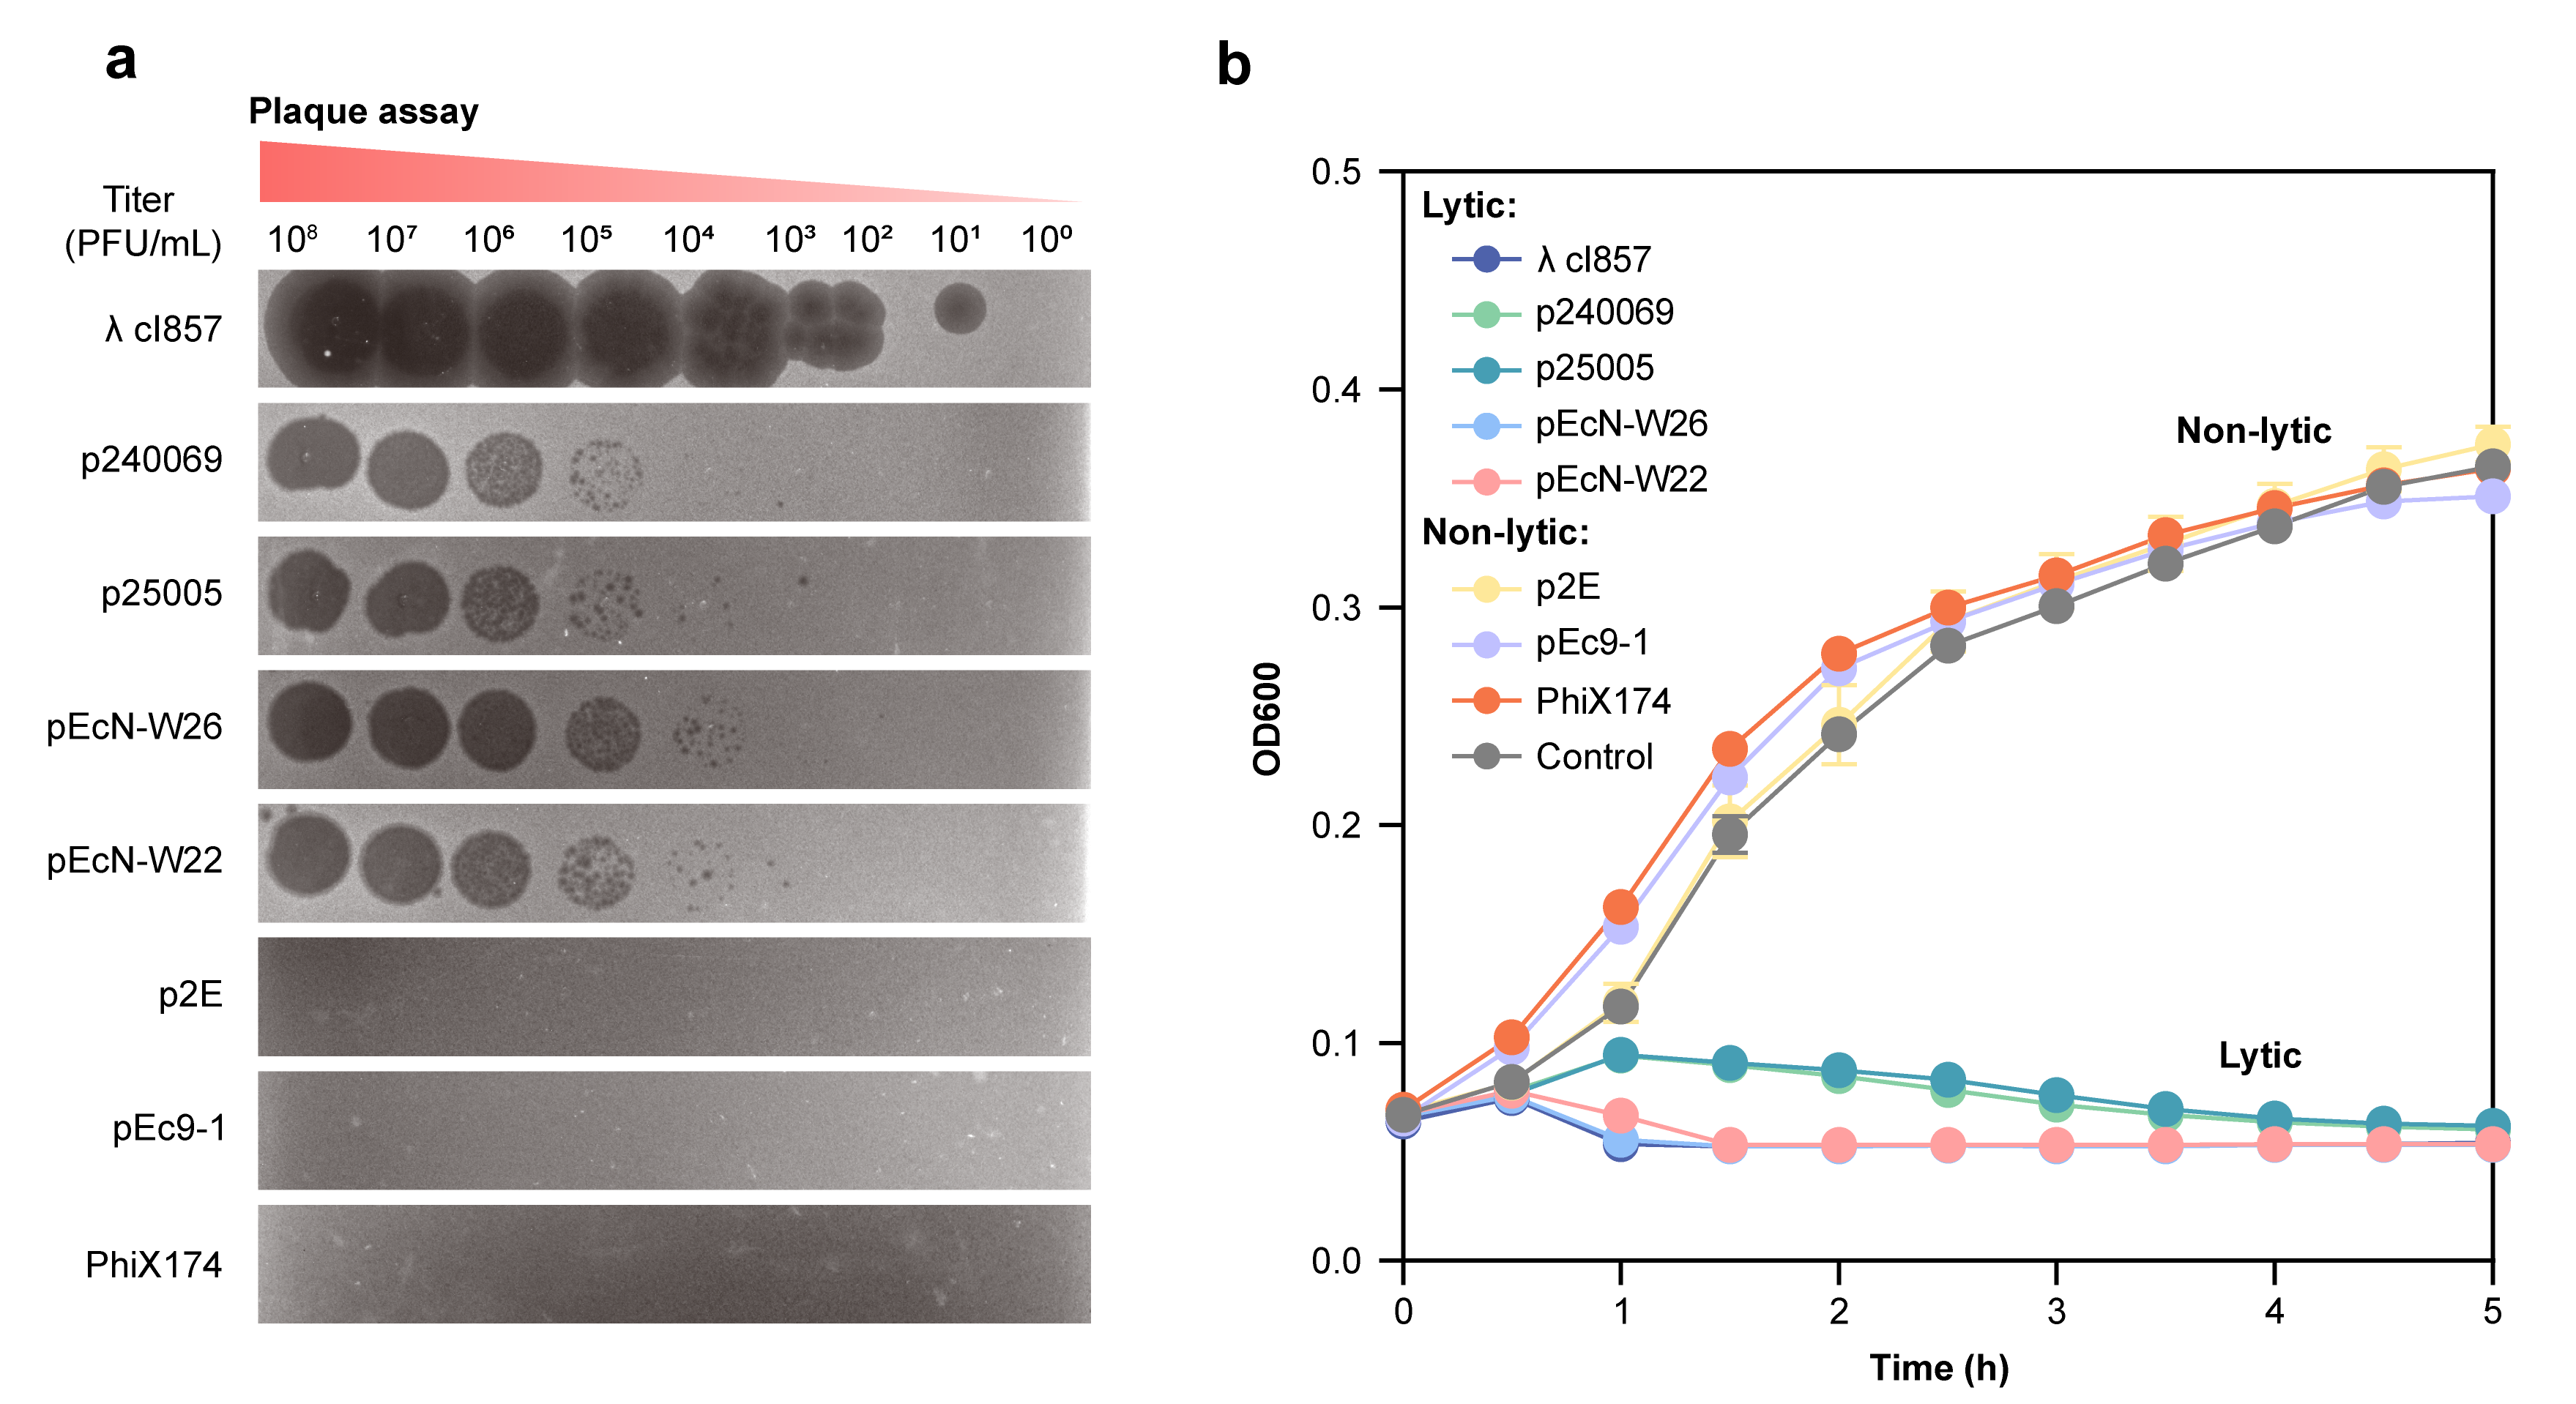


**Supplementary Fig. 4. Evaluation of phage susceptibility via conventional phenotypic assays.**

**a,** Representative images of double-layer agar plaque assays performed with 10-fold serial dilutions. While high titers produce visible lysis, lower titers often yield indistinct plaques that complicate manual enumeration. **b,** Time-resolved growth kinetics (OD600) monitored over 5 h. Although the assay effectively separates lytic from non-lytic groups, it fails to resolve kinetic nuances among productive phages, which cluster indistinguishably near the baseline. Data represent mean ± s.d. (*n* = 3).

****
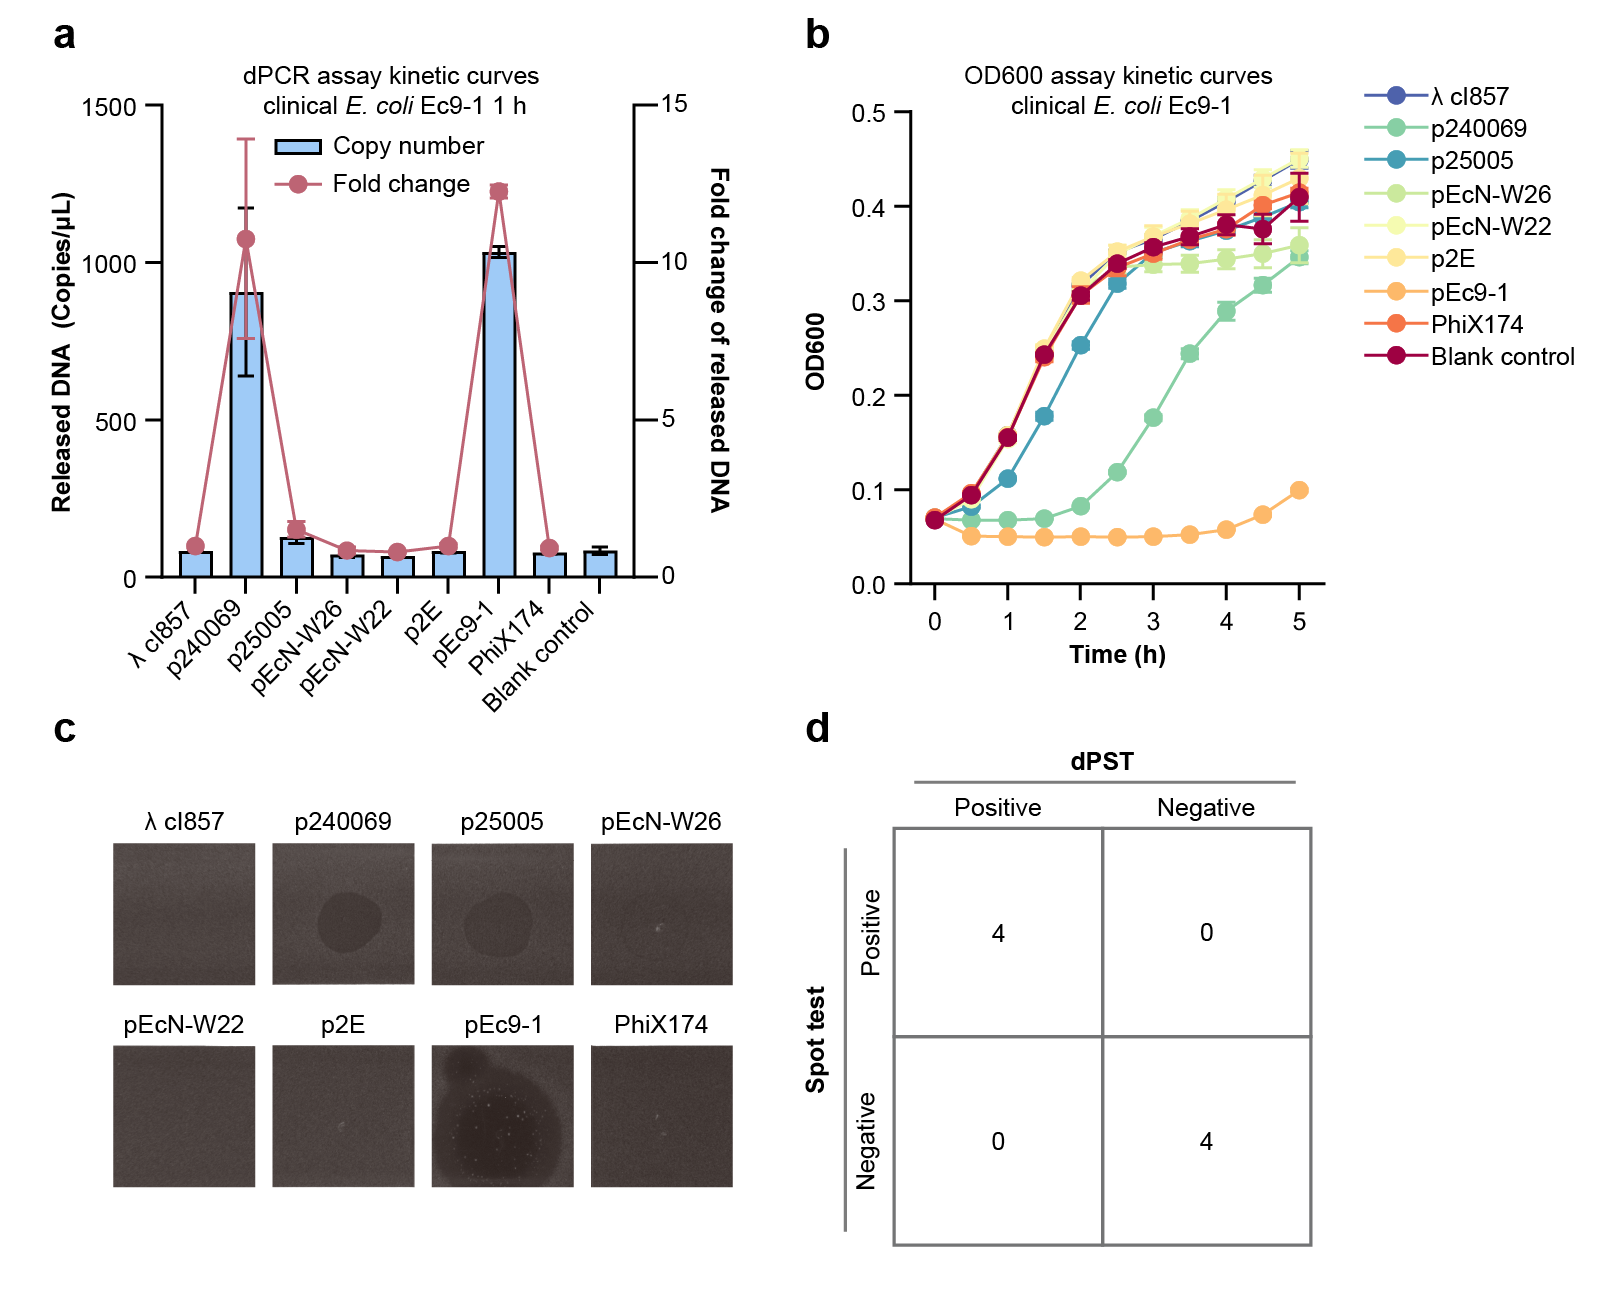
****

**Supplementary Fig. 5. Comparative profiling of phage–host interactions for clinical *E. coli* isolate Ec9-1.**

****a,** dPST quantification of released genomic DNA (blue bars) and corresponding fold-change values (red line) following 1 h of phage co-incubation. **b,** Real-time bacterial growth kinetics (OD600) monitored over 5 h. **c,** Representative spot test images validating lytic phenotypes. **d,** Consistency matrix demonstrating complete concordance between dPST classifications and spot test results. Data represent mean** ± **s.d. (*n* = 3).**


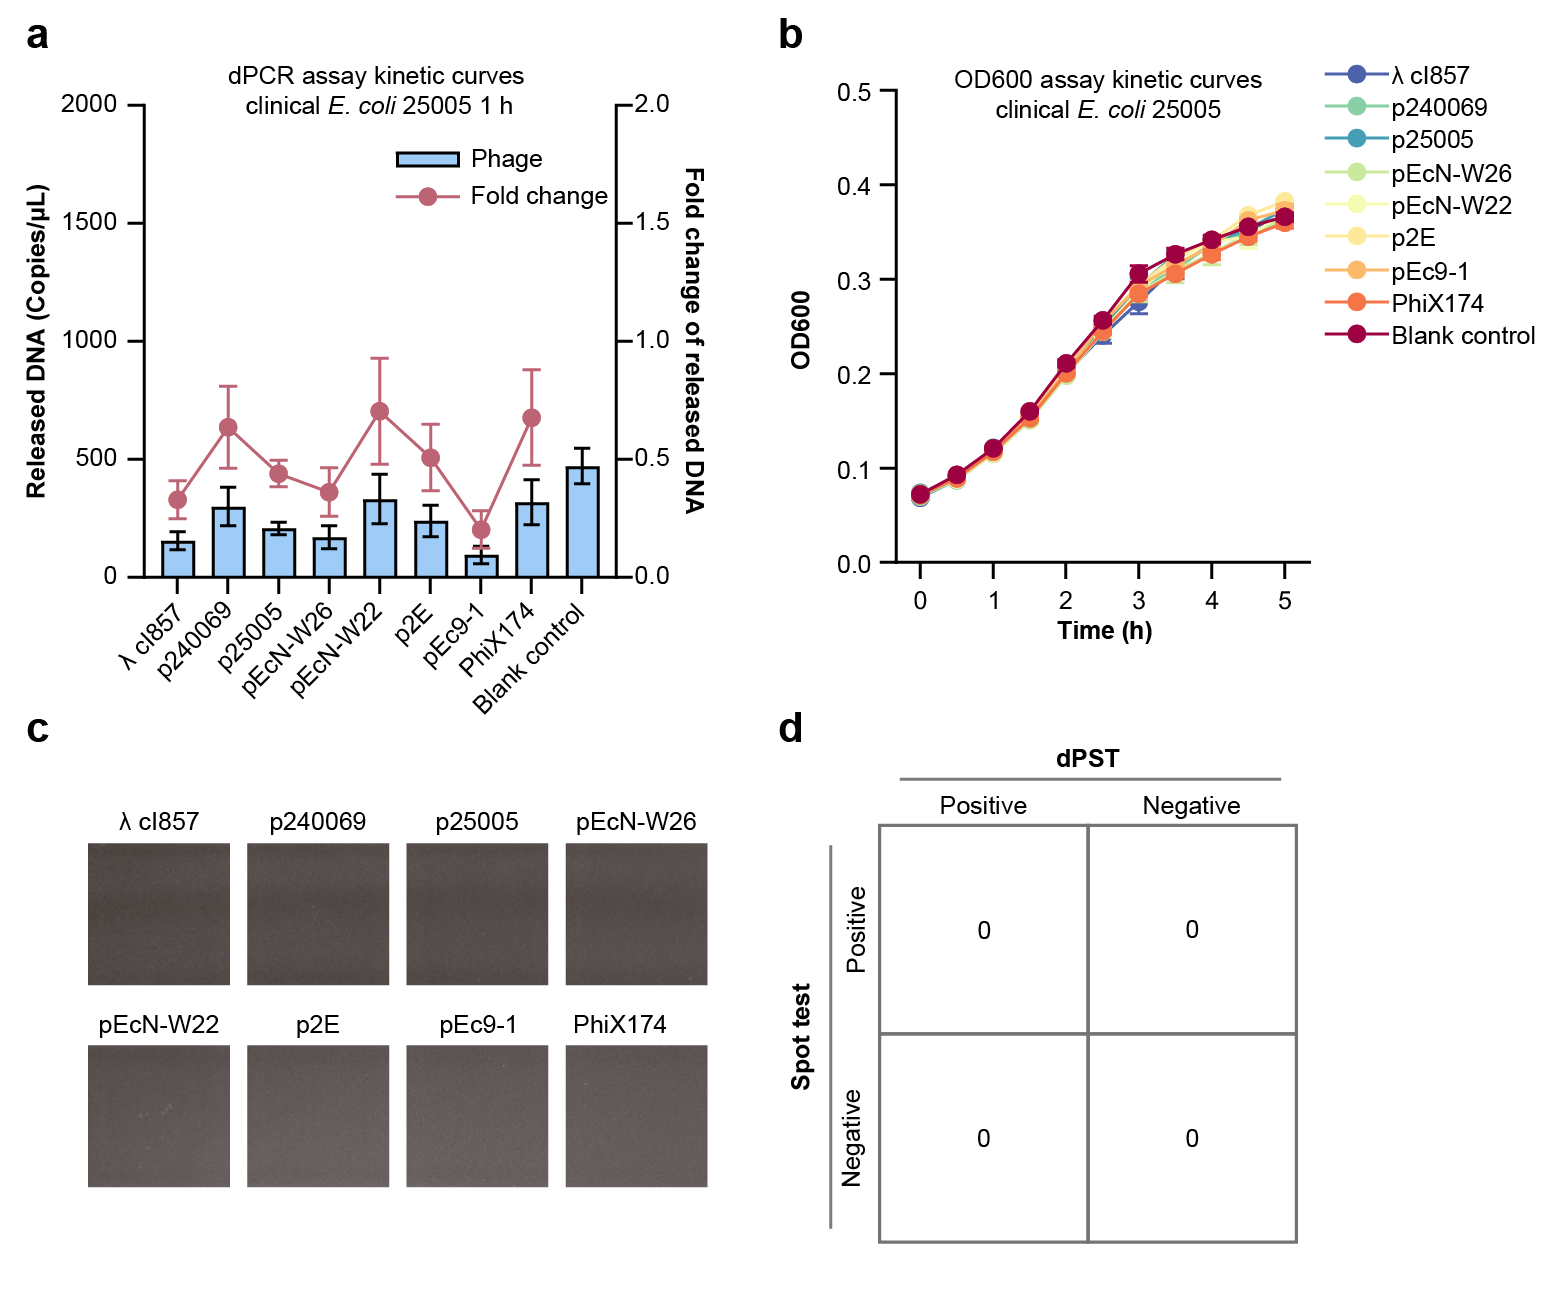


**Supplementary Fig. 6. Comparative profiling of phage–host interactions for clinical *E. coli* isolate 25005.**

****a,** dPST quantification of released genomic DNA (blue bars) and corresponding fold-change values (red line) following 1 h of phage co-incubation. **b,** Real-time bacterial growth kinetics (OD600) monitored over 5 h. **c,** Representative spot test images validating lytic phenotypes. **d,** Consistency matrix demonstrating complete concordance between dPST classifications and spot test results. Data represent mean** ± **s.d. (*n* = 3).**

**
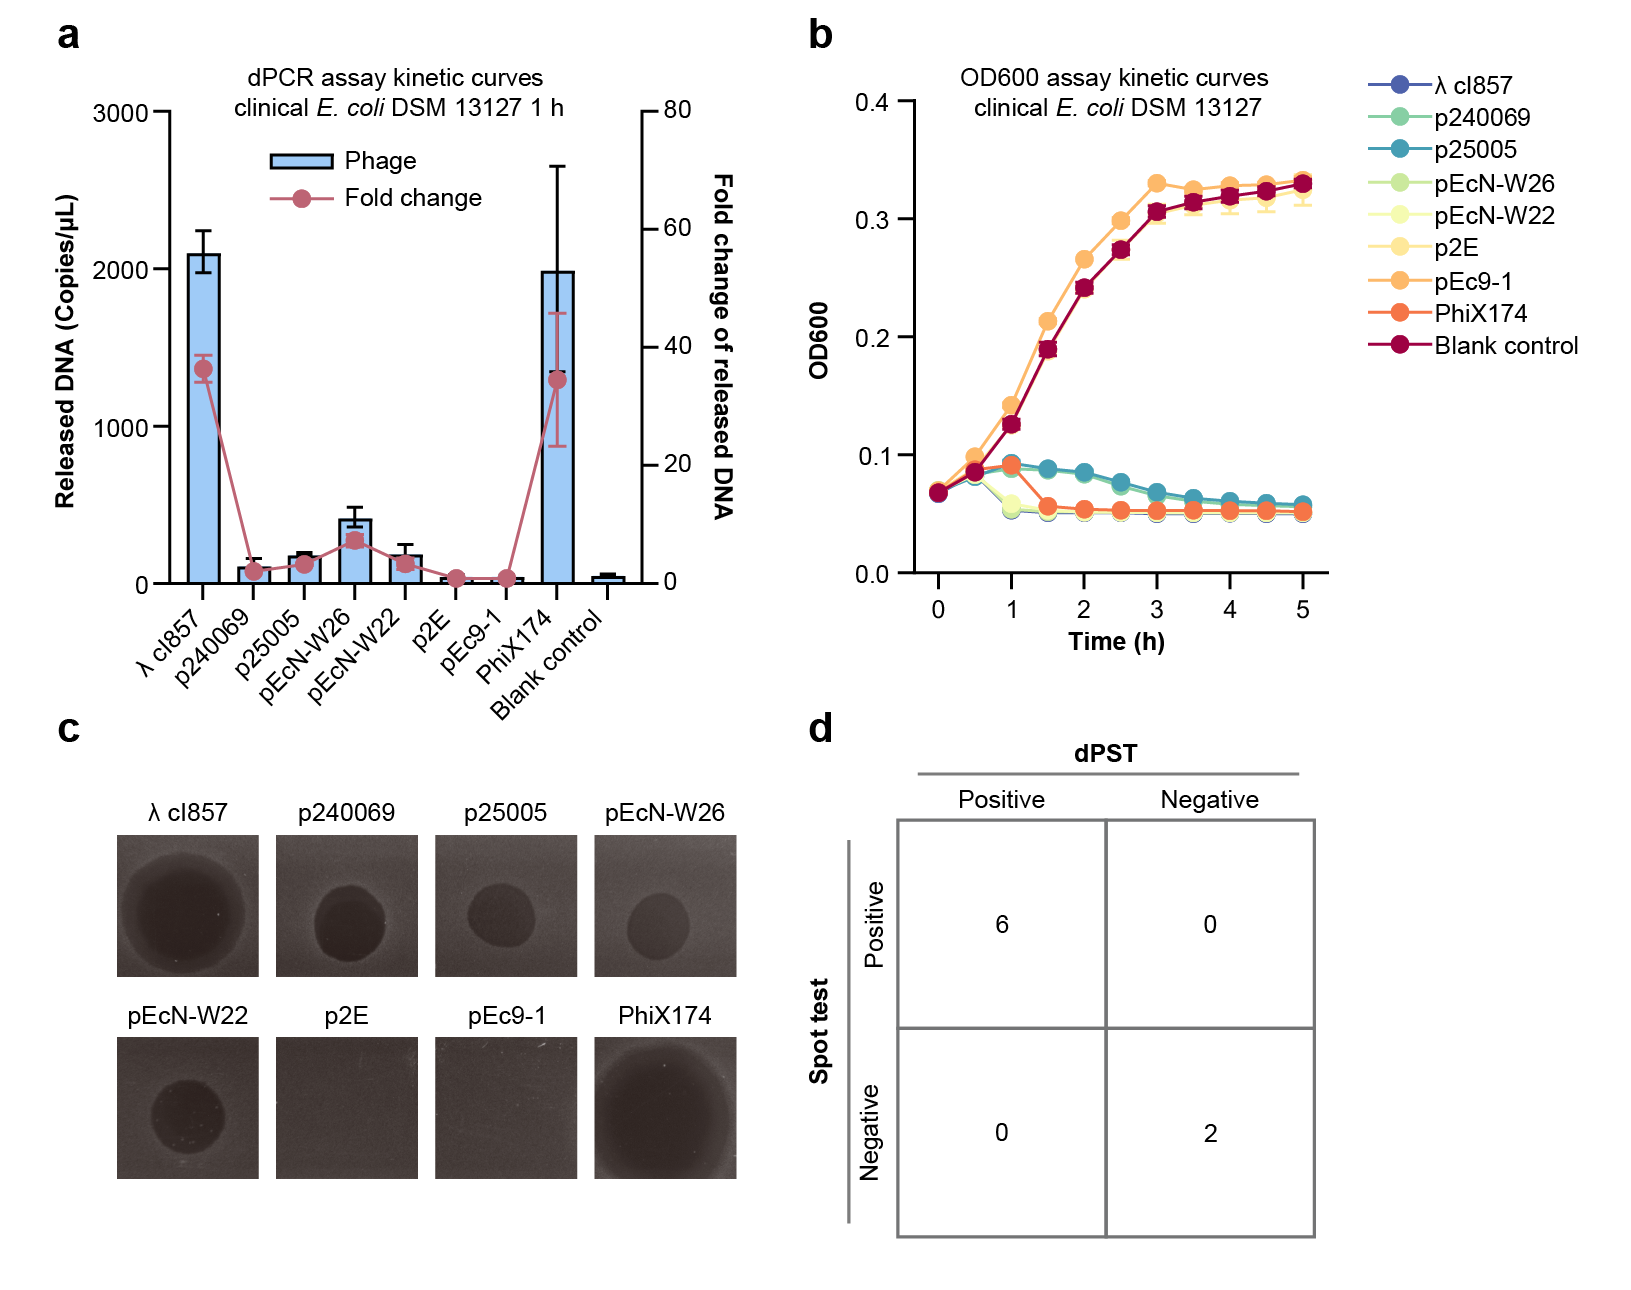
**

**Supplementary Fig. 7. Comparative profiling of phage–host interactions for clinical *E. coli* strai**n DSM 13127**.**

****a,** dPST quantification of released genomic DNA (blue bars) and corresponding fold-change values (red line) following 1 h of phage co-incubation. **b,** Real-time bacterial growth kinetics (OD600) monitored over 5 h. **c,** Representative spot test images validating lytic phenotypes. **d,** Consistency matrix demonstrating complete concordance between dPST classifications and spot test results. Data represent mean** ± **s.d. (*n* = 3).**

**
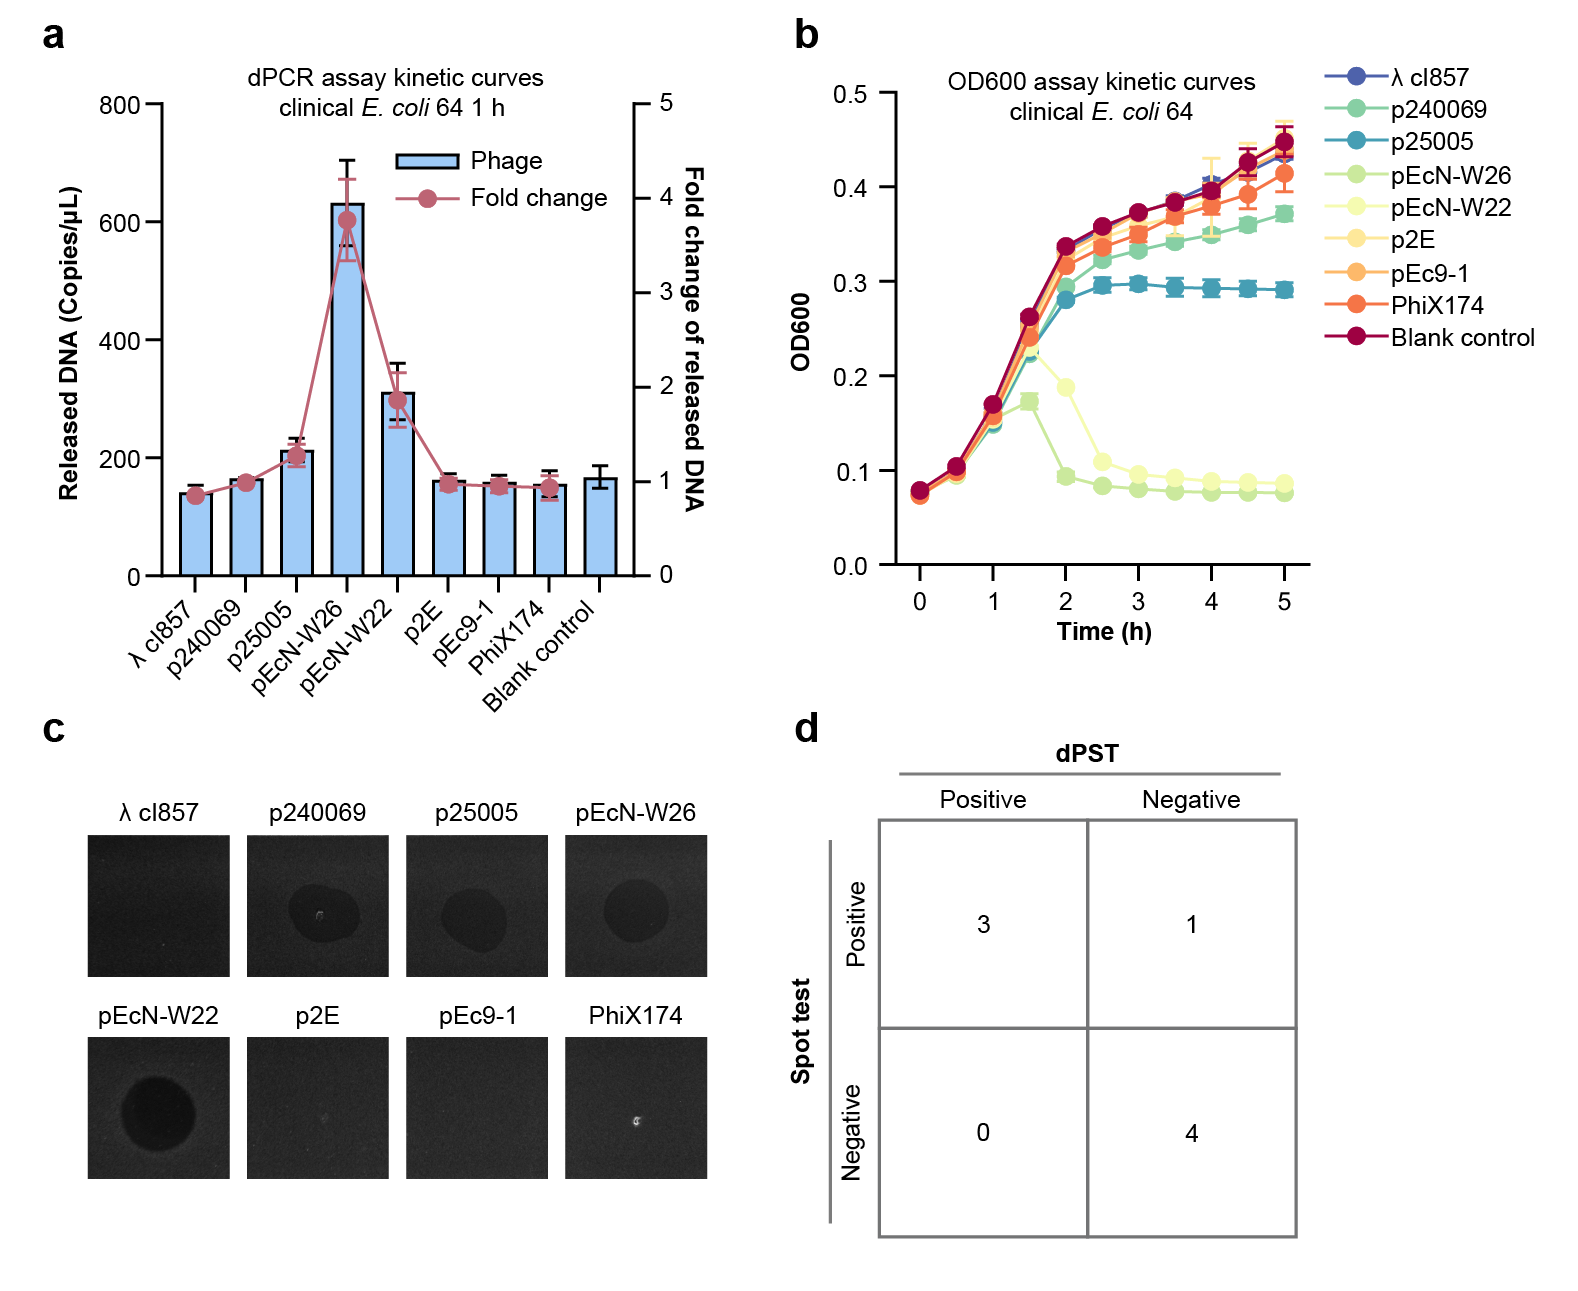
**

**Supplementary Fig. 8. Comparative profiling of phage–host interactions for clinical *E. coli* isolate **64**.**

****a,** dPST quantification of released genomic DNA (blue bars) and corresponding fold-change values (red line) following 1 h of phage co-incubation. **b,** Real-time bacterial growth kinetics (OD600) monitored over 5 h. **c,** Representative spot test images validating lytic phenotypes. **d,** Consistency matrix demonstrating complete concordance between dPST classifications and spot test results. Data represent mean** ± **s.d. (*n* = 3).**

**
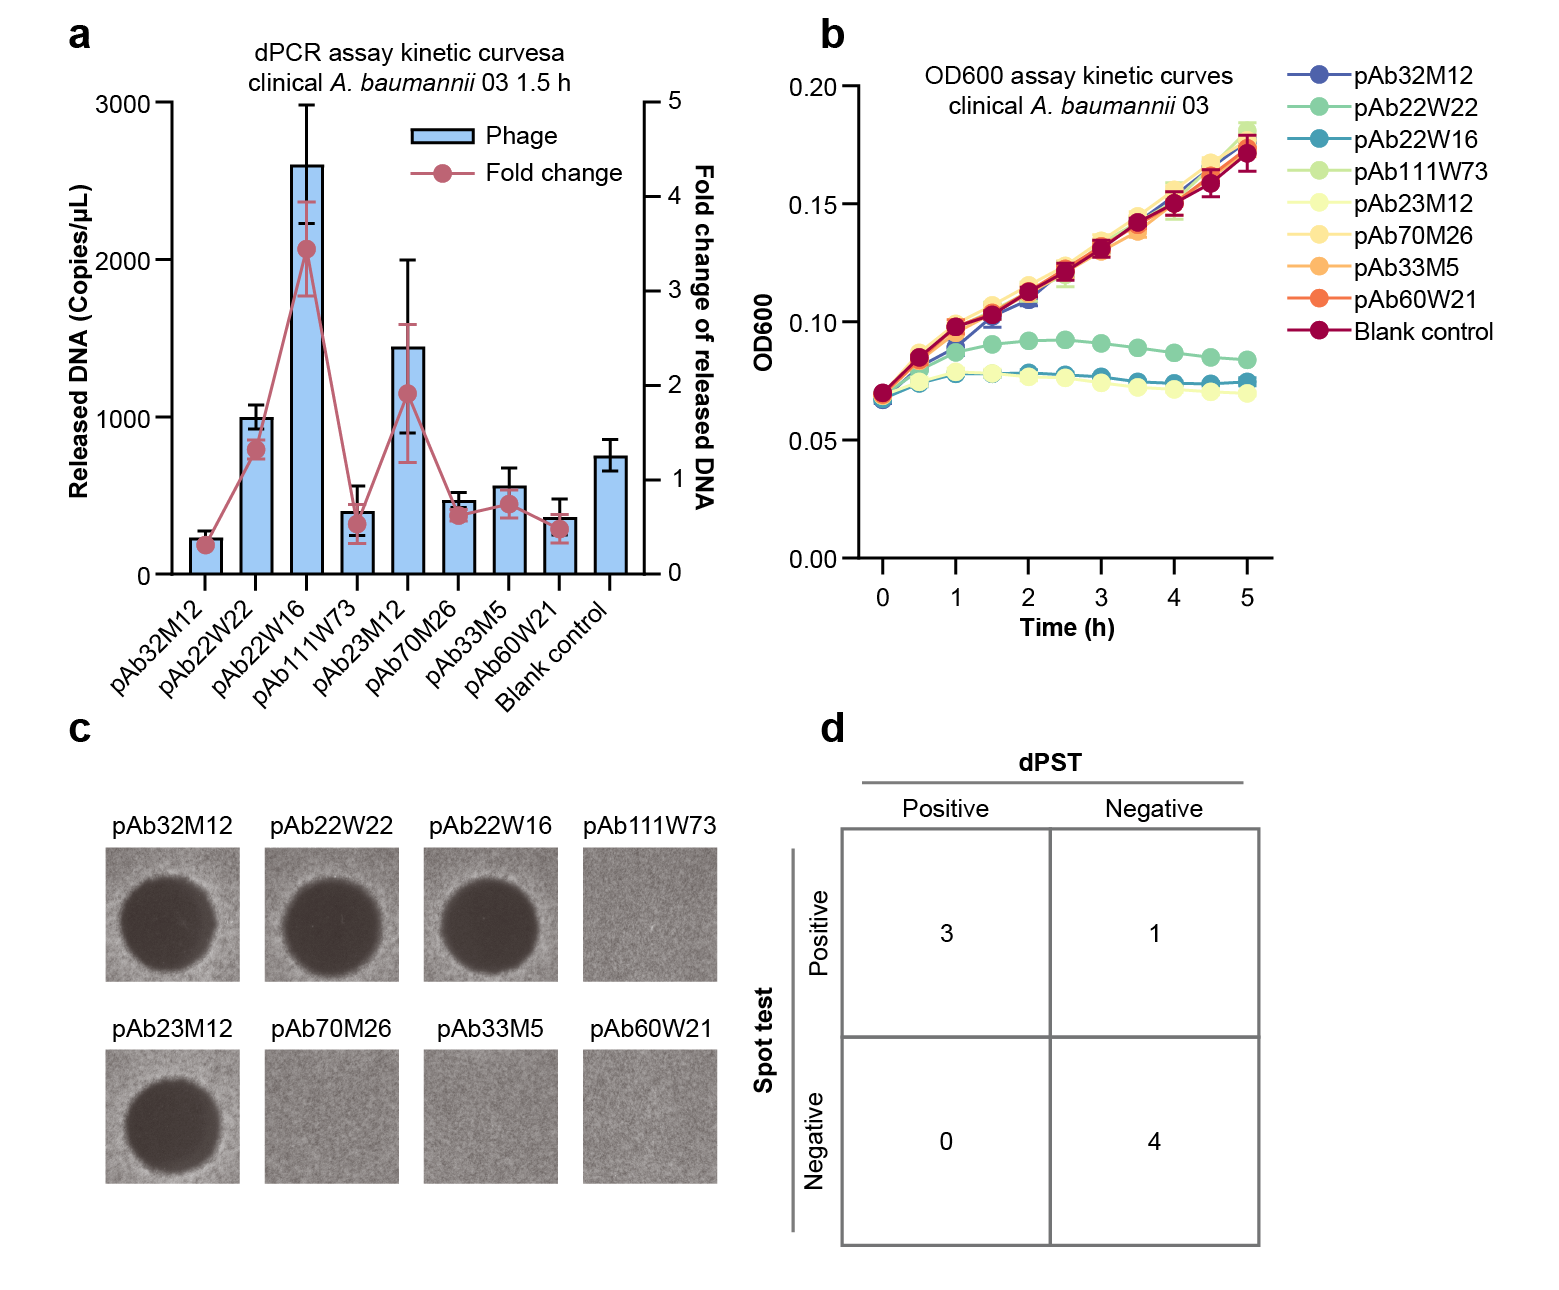
**

**Supplementary Fig. 9. Comparative profiling of phage–host interactions for clinical *A. baumannii* isolate Aba03.**

****a,** dPST quantification of released genomic DNA (blue bars) and corresponding fold-change values (red line) following 1.5 h of phage co-incubation. **b,** Real-time bacterial growth kinetics (OD600) monitored over 5 h. **c,** Representative spot test images validating lytic phenotypes. **d,** Consistency matrix comparing dPST classifications with spot test outcomes. Data represent mean** ± **s.d. (*n* = 3).**

**
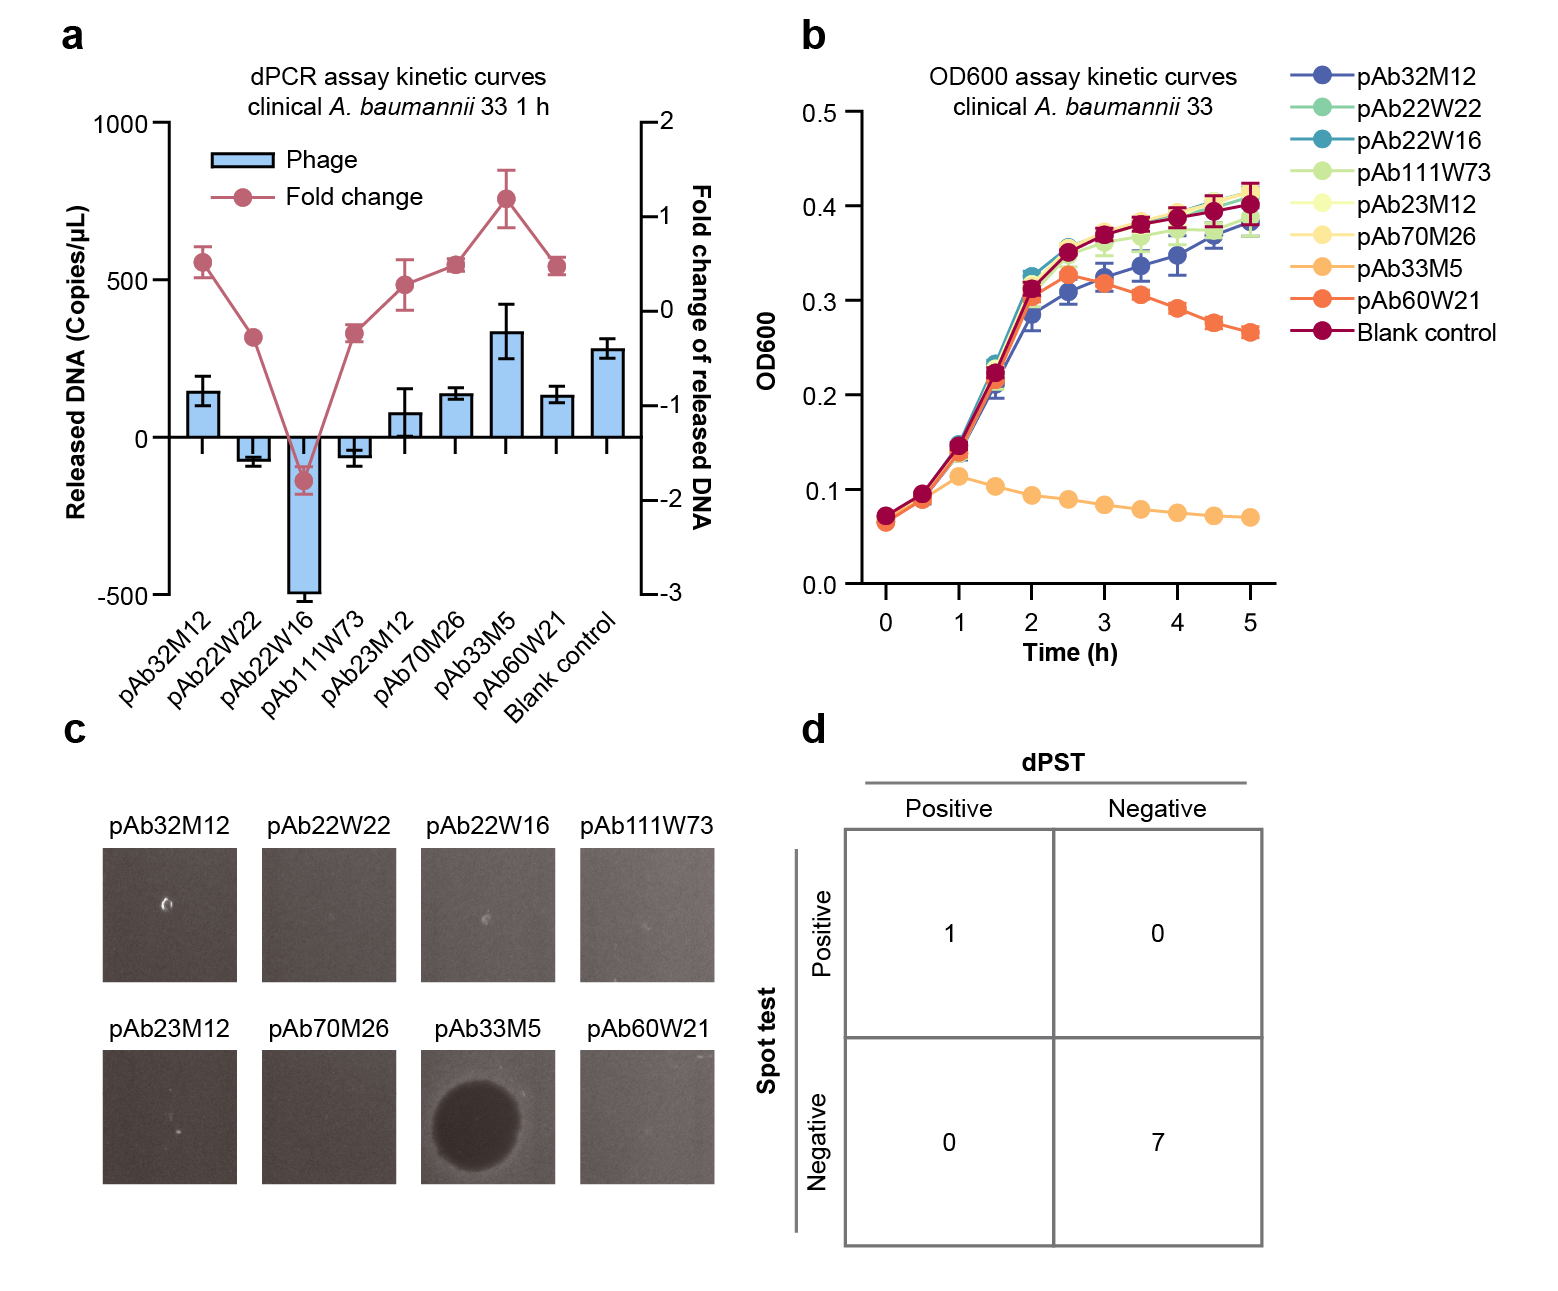
**

**Supplementary Fig. 10. Comparative profiling of phage–host interactions for clinical *A. baumannii* isolate Aba33.**

****a,** dPST quantification of released genomic DNA (blue bars) and corresponding fold-change values (red line) following 1.5 h of phage co-incubation. **b,** Real-time bacterial growth kinetics (OD600) monitored over 5 h. **c,** Representative spot test images validating lytic phenotypes. **d,** Consistency matrix comparing dPST classifications with spot test outcomes. Data represent mean** ± **s.d. (*n* = 3).**

**
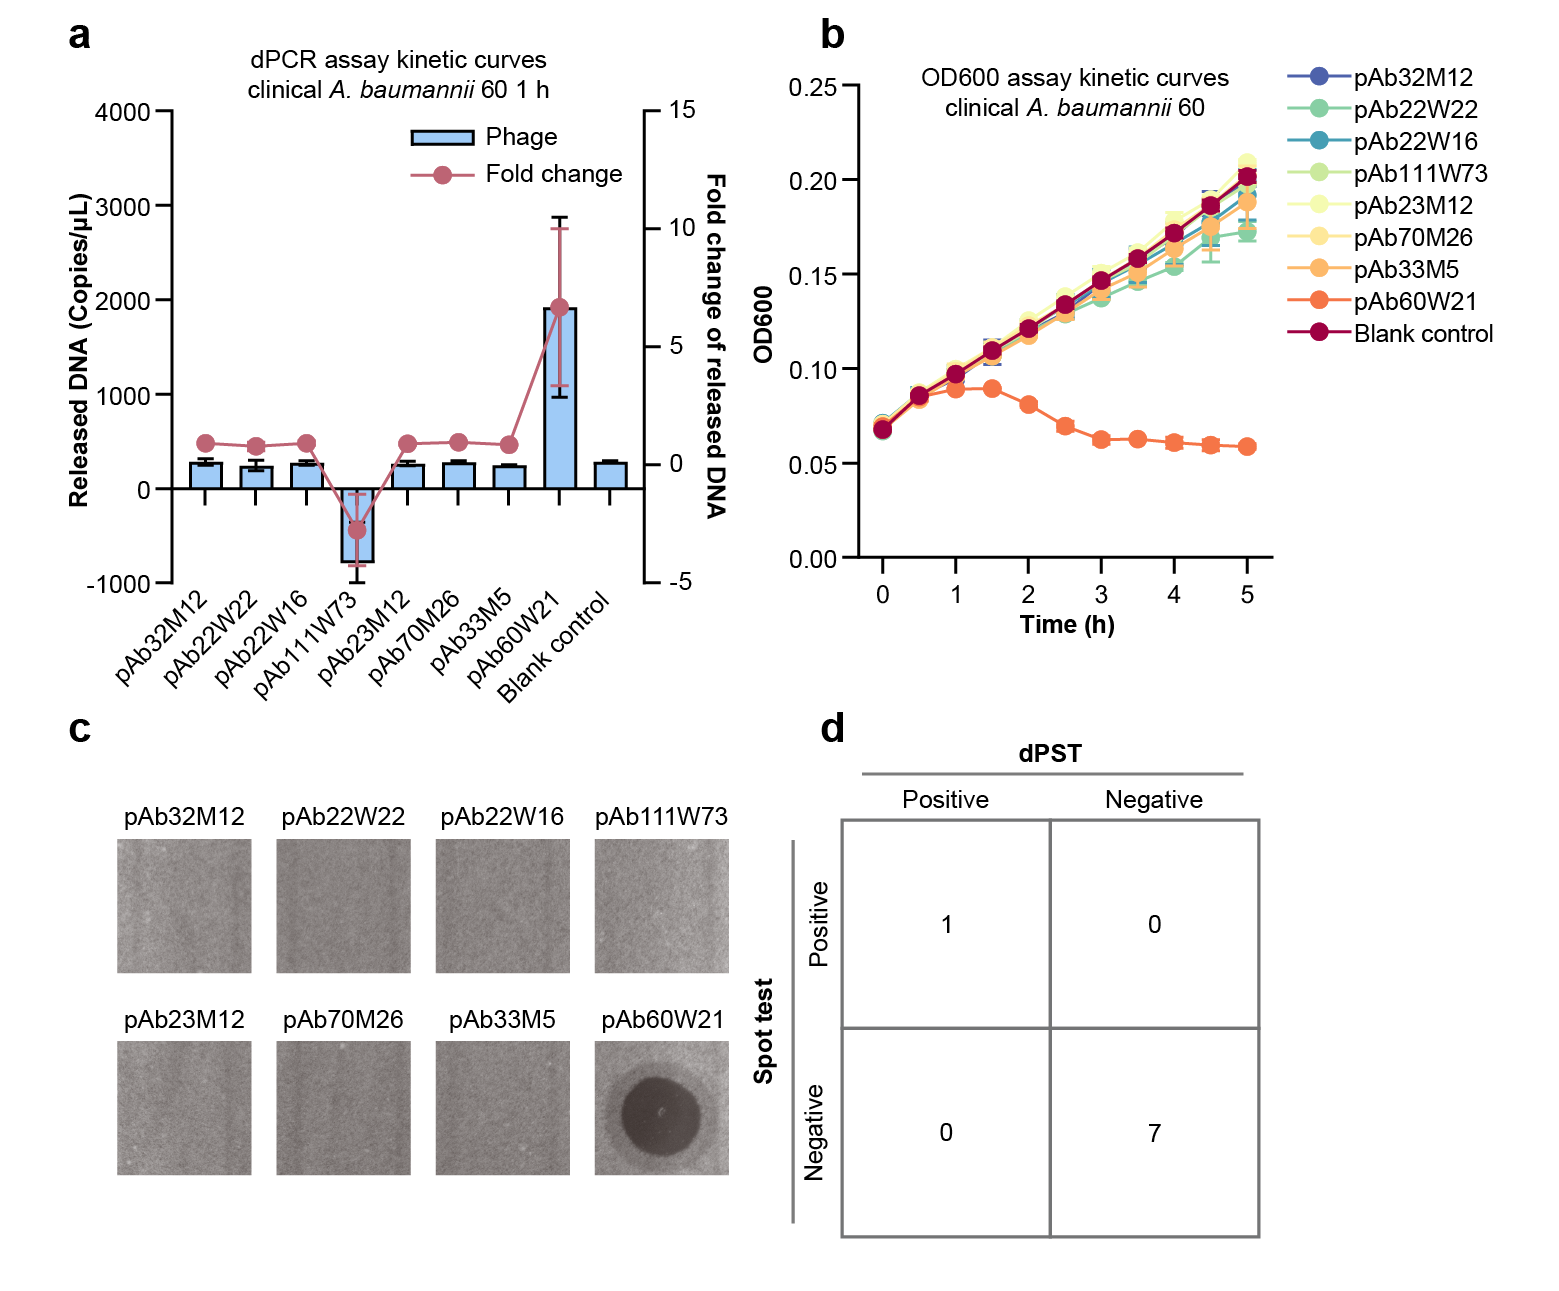
**

**Supplementary Fig. 11. Comparative profiling of phage–host interactions for clinical *A. baumannii* isolate Aba60.**

****a,** dPST quantification of released genomic DNA (blue bars) and corresponding fold-change values (red line) following 1.5 h of phage co-incubation. **b,** Real-time bacterial growth kinetics (OD600) monitored over 5 h. **c,** Representative spot test images validating lytic phenotypes. **d,** Consistency matrix comparing dPST classifications with spot test outcomes. Data represent mean** ± **s.d. (*n* = 3).**

**
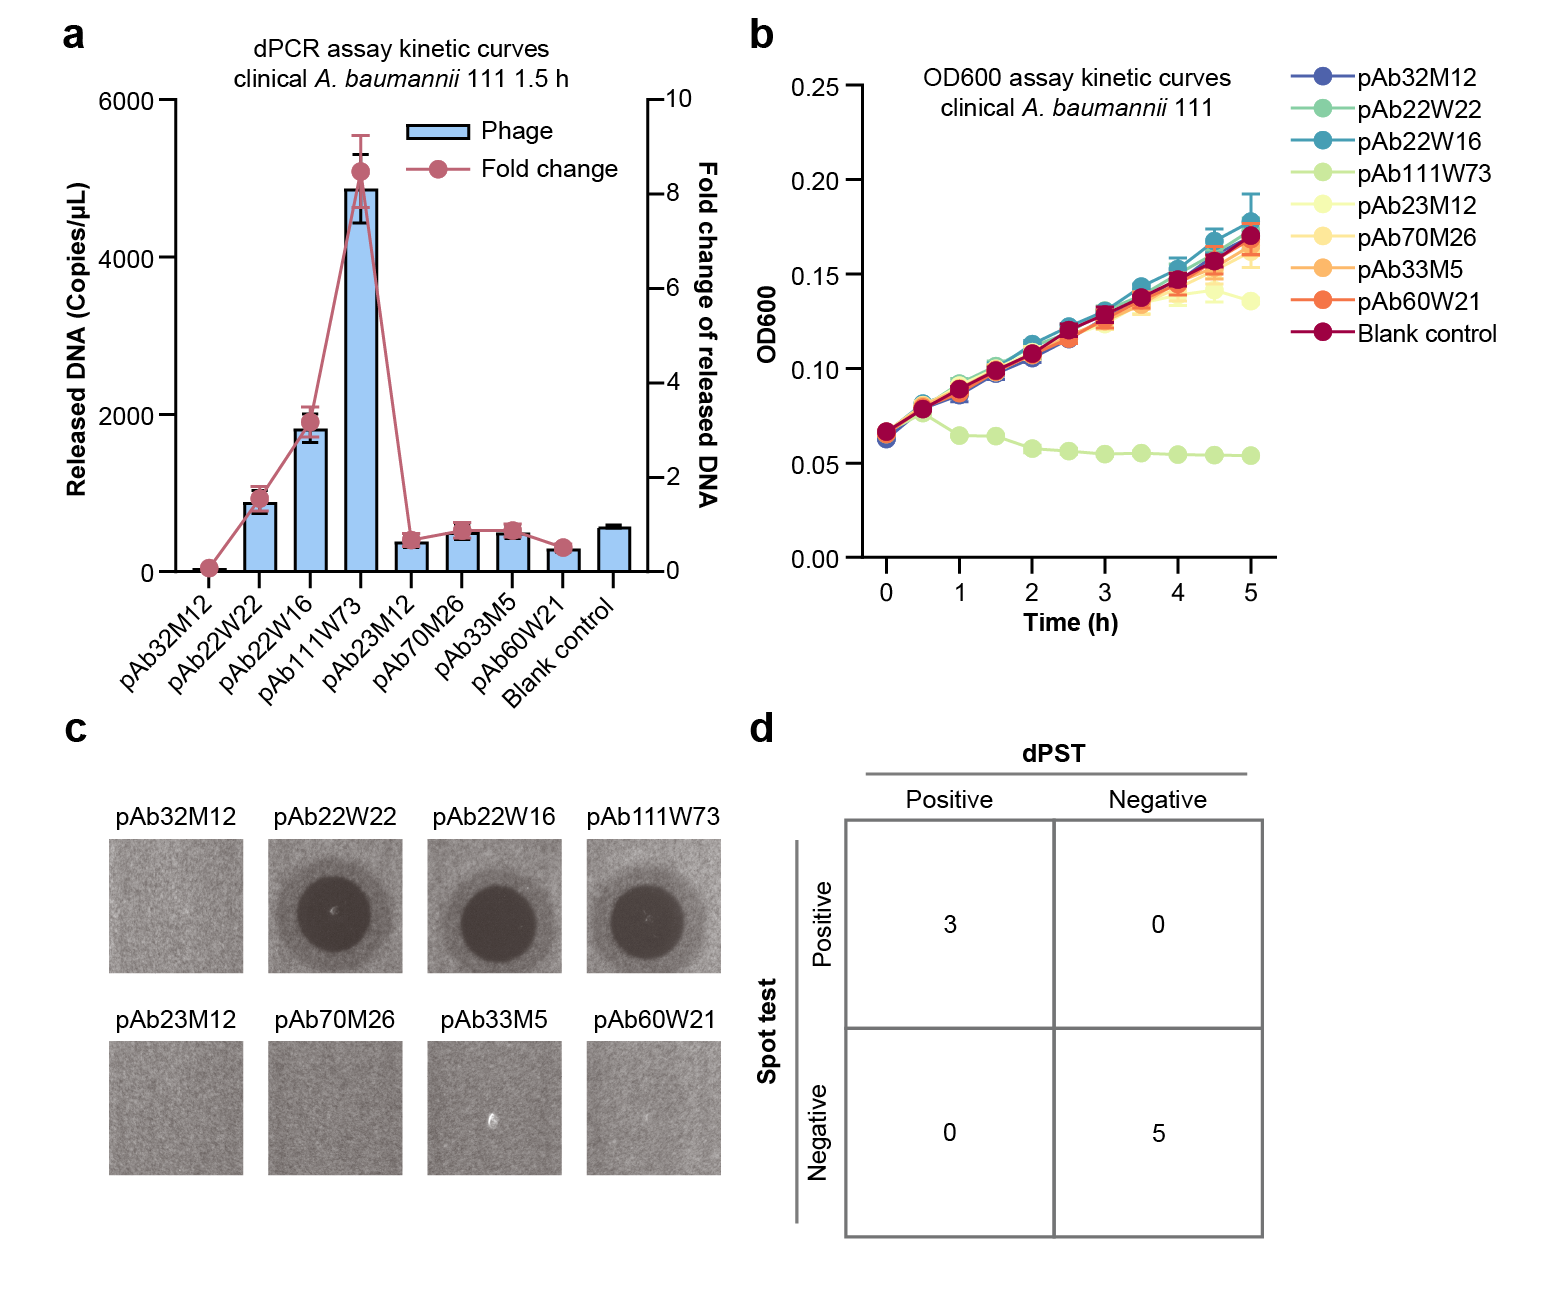
**

**Supplementary Fig. 12. Comparative profiling of phage–host interactions for clinical *A. baumannii* isolate Aba111.**

****a,** dPST quantification of released genomic DNA (blue bars) and corresponding fold-change values (red line) following 1.5 h of phage co-incubation. **b,** Real-time bacterial growth kinetics (OD600) monitored over 5 h. **c,** Representative spot test images validating lytic phenotypes. **d,** Consistency matrix comparing dPST classifications with spot test outcomes. Data represent mean** ± **s.d. (*n* = 3).**

**
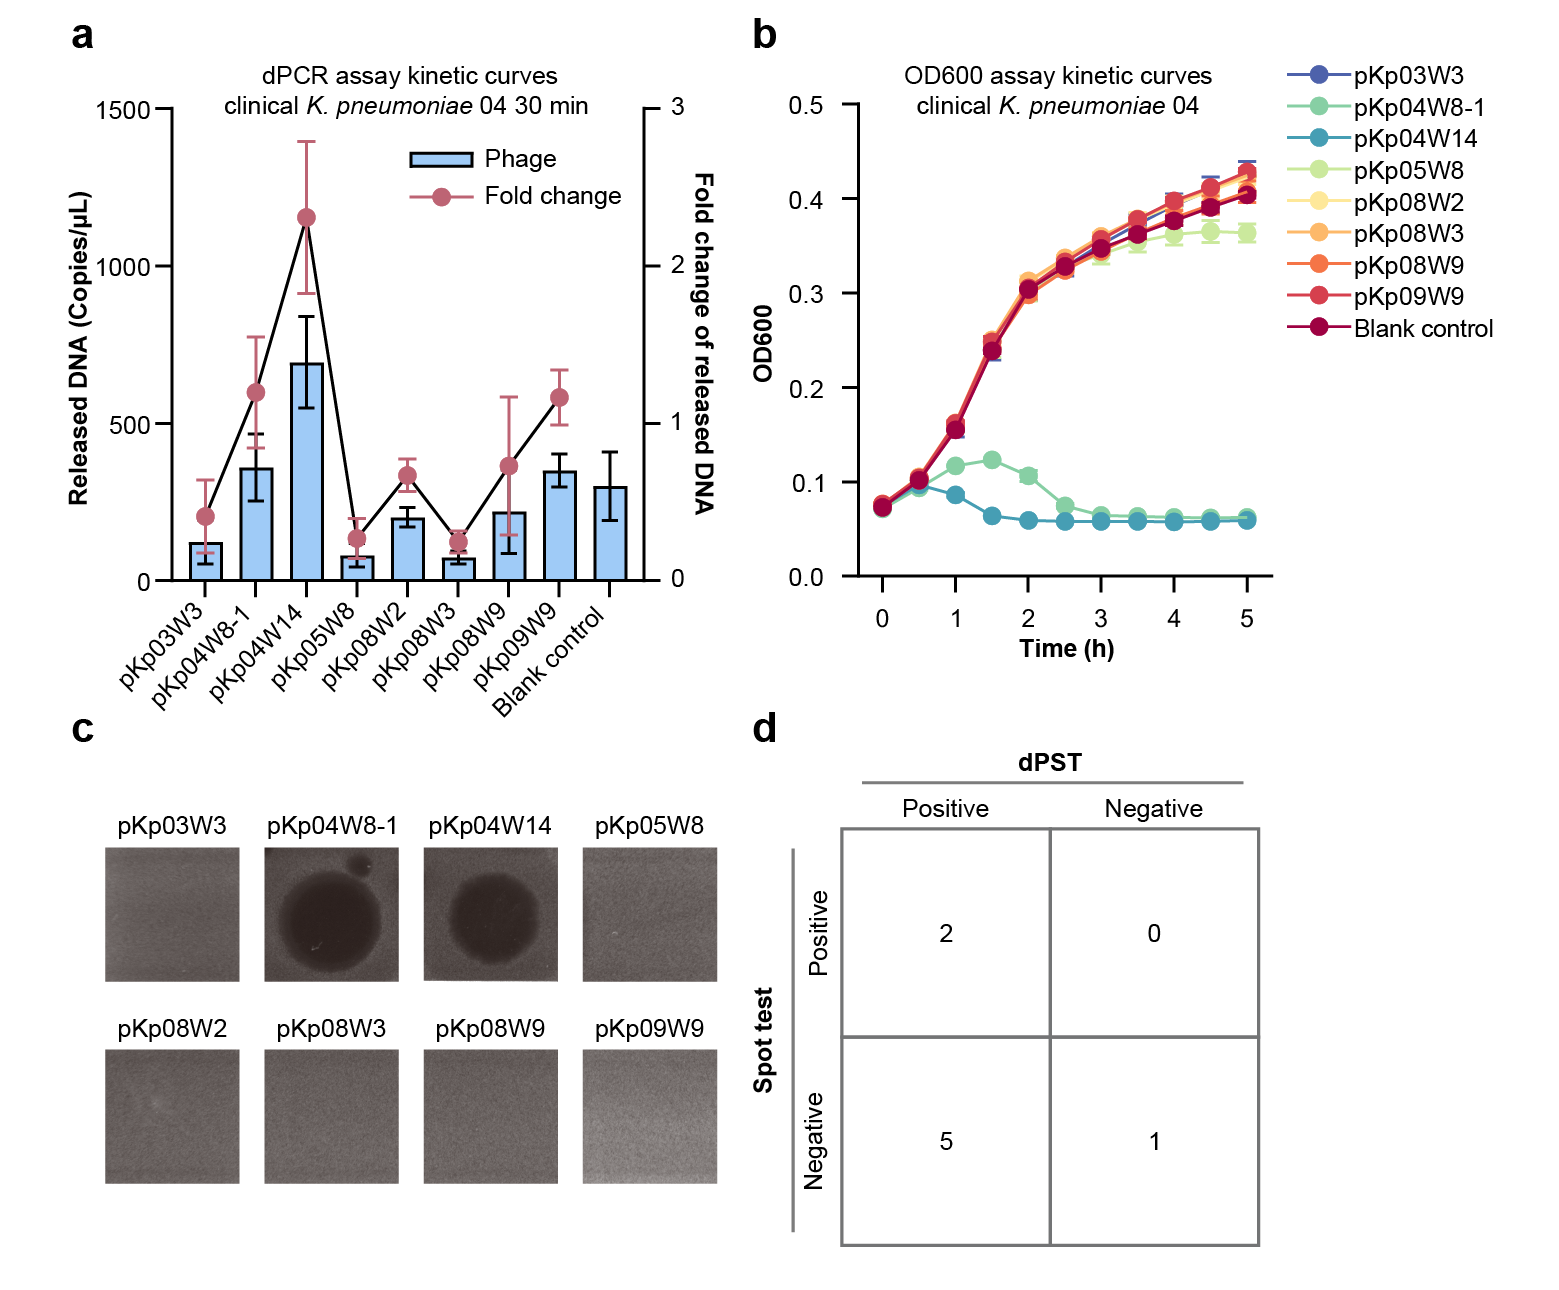
**

**Supplementary Fig. 13. Comparative profiling of phage–host interactions for clinical *K. pneumoniae* isolate Kpn04.**

****a,** dPST quantification of released genomic DNA (blue bars) and corresponding fold-change values (red line) following 30 min of phage co-incubation. **b,** Real-time bacterial growth kinetics (OD600) monitored over 5 h. **c,** Representative spot test images determining lytic phenotypes. **d,** Consistency matrix comparing dPST classifications with spot test outcomes. Data represent mean** ± **s.d. (*n* = 3).**

**
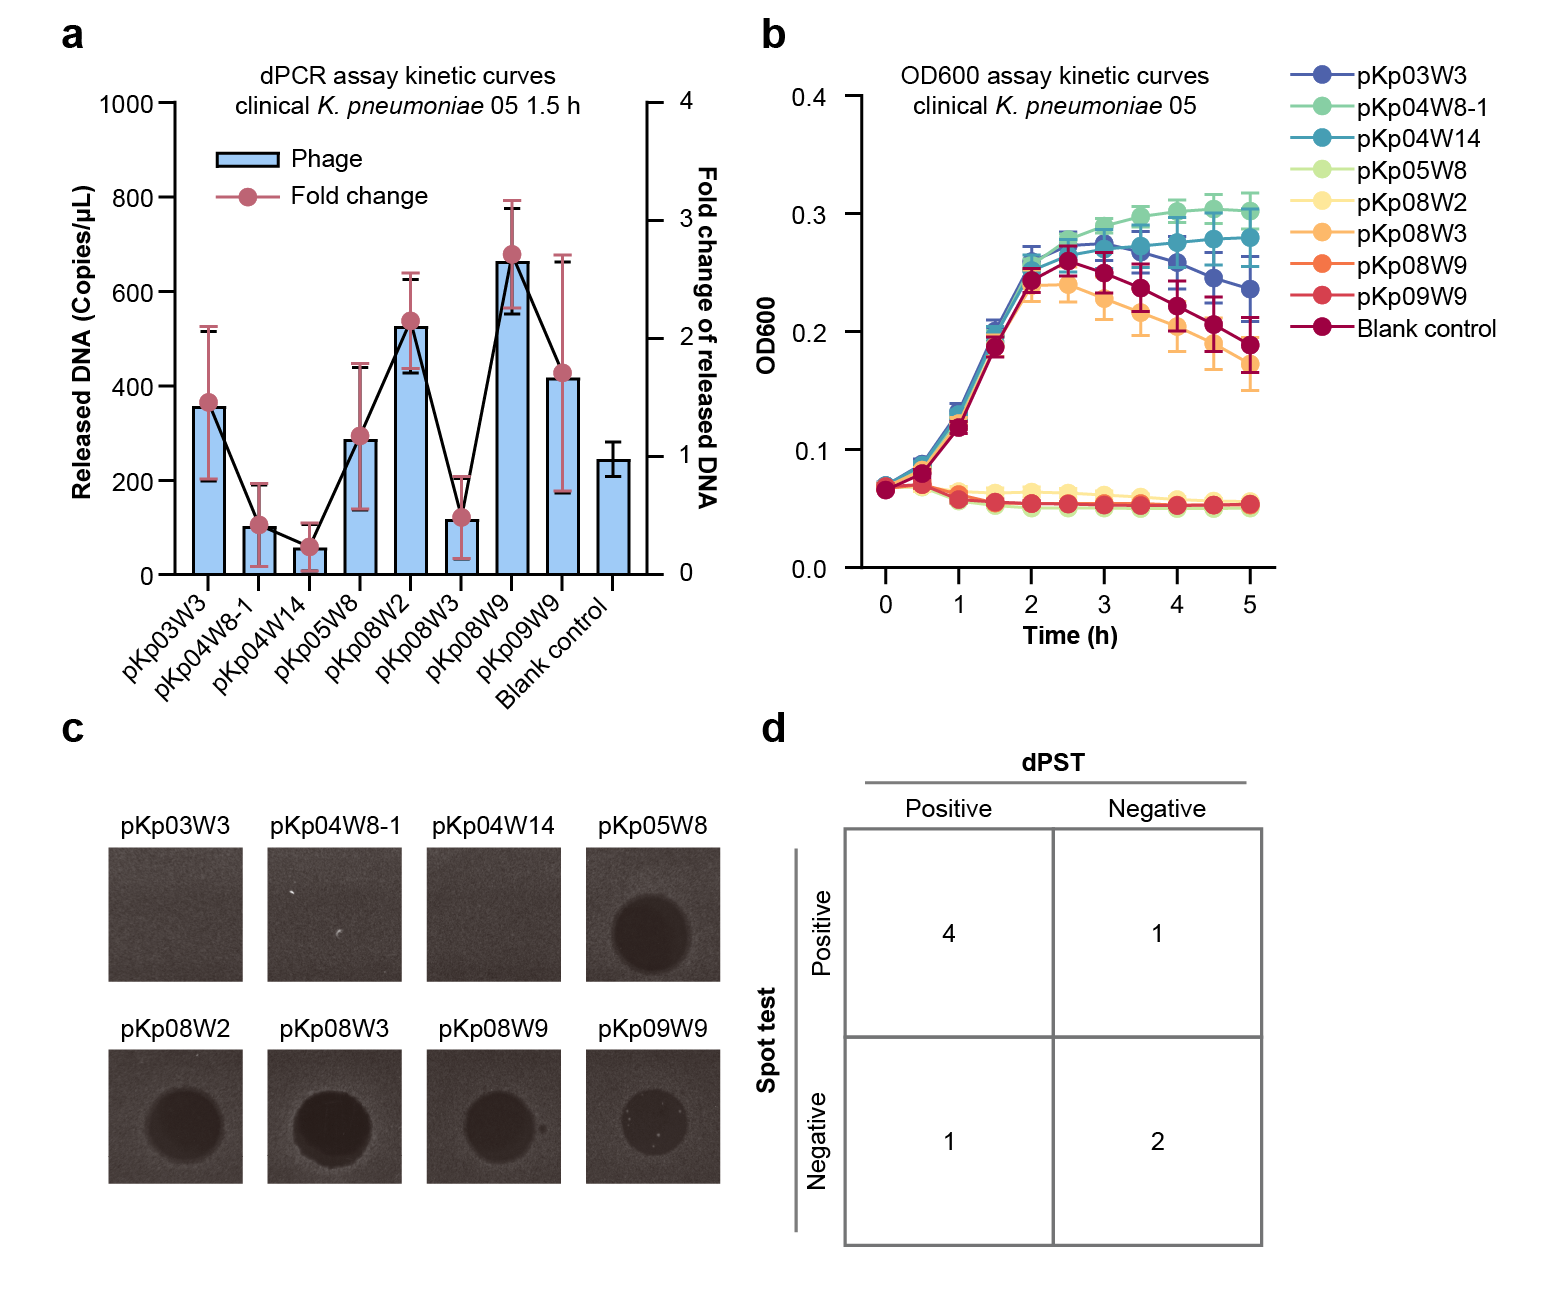
**

**Supplementary Fig. 14. Comparative profiling of phage–host interactions for clinical *K. pneumoniae* isolate Kpn05.**

****a,** dPST quantification of released genomic DNA (blue bars) and corresponding fold-change values (red line) following 30 min of phage co-incubation. **b,** Real-time bacterial growth kinetics (OD600) monitored over 5 h. **c,** Representative spot test images determining lytic phenotypes. **d,** Consistency matrix comparing dPST classifications with spot test outcomes. Data represent mean** ± **s.d. (*n* = 3).**

**
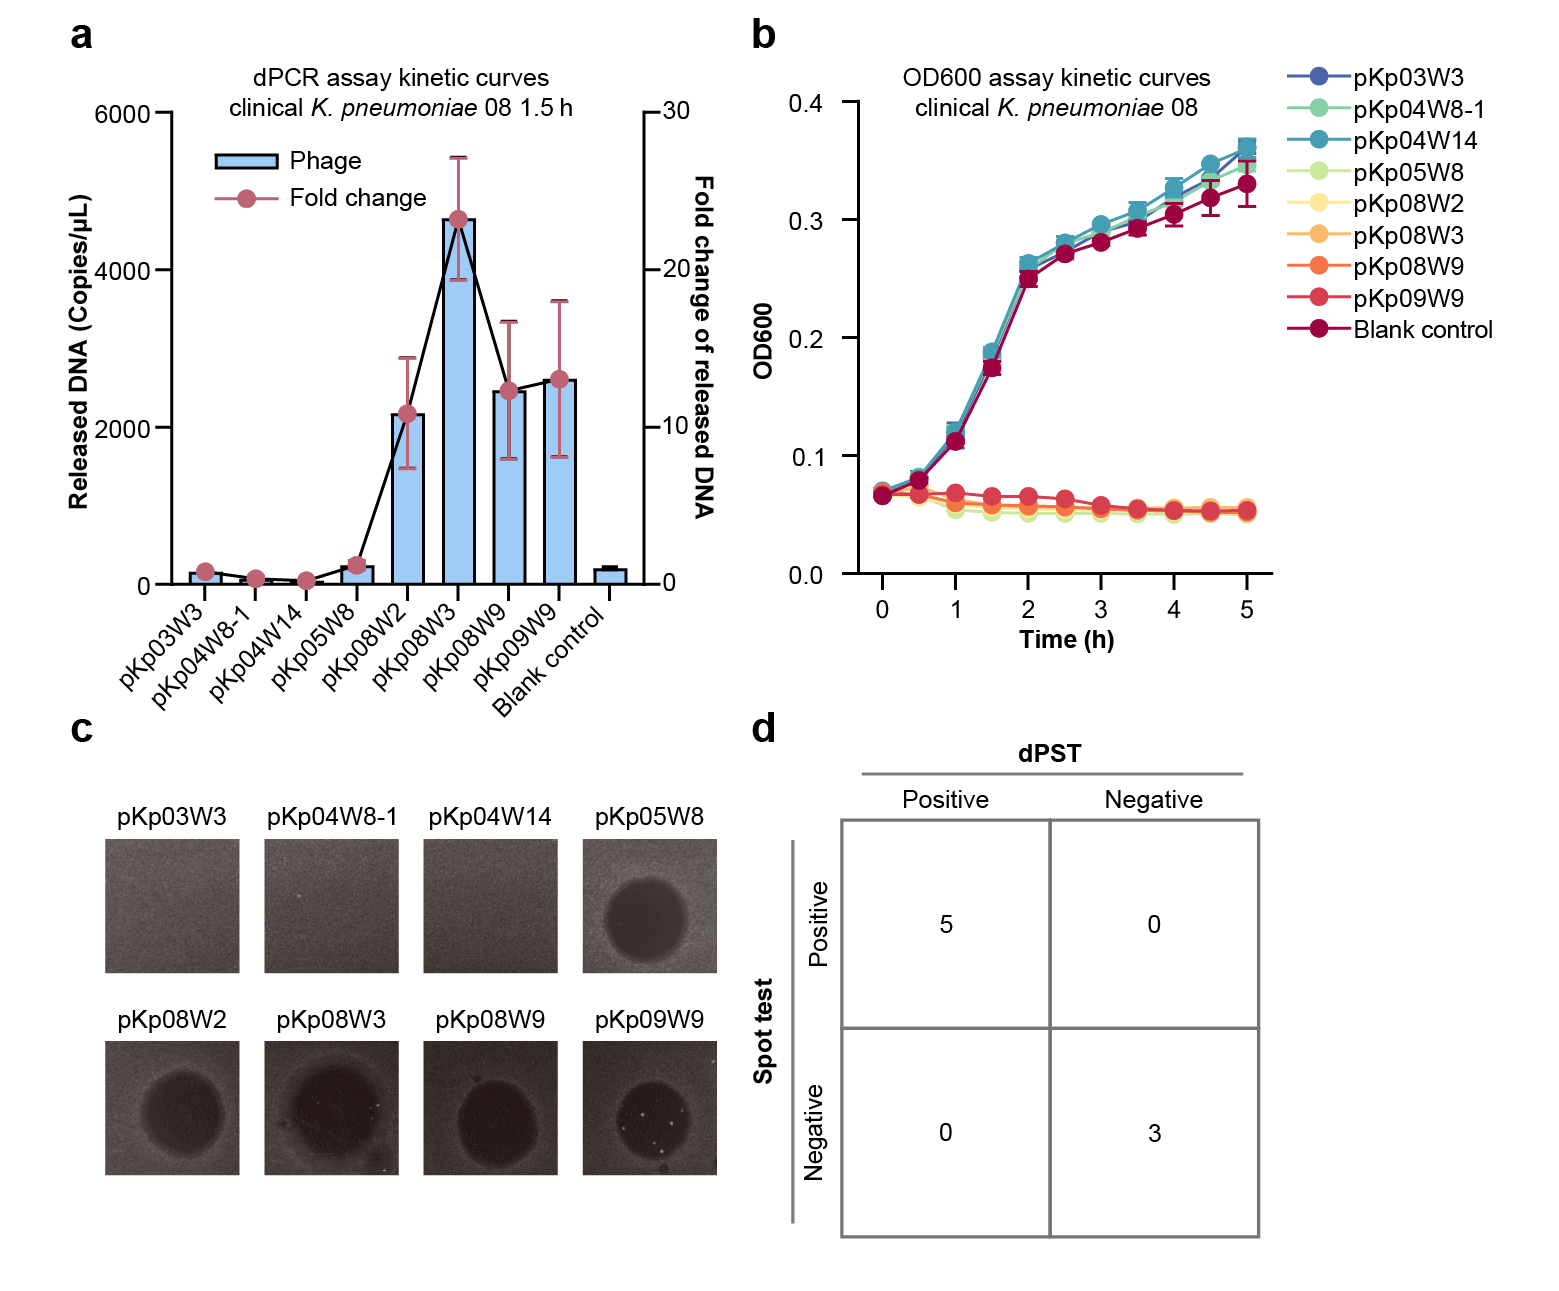
**

**Supplementary Fig. 15. Comparative profiling of phage–host interactions for clinical *K. pneumoniae* isolate Kpn08.**

****a,** dPST quantification of released genomic DNA (blue bars) and corresponding fold-change values (red line) following 30 min of phage co-incubation. **b,** Real-time bacterial growth kinetics (OD600) monitored over 5 h. **c,** Representative spot test images determining lytic phenotypes. **d,** Consistency matrix comparing dPST classifications with spot test outcomes. Data represent mean** ± **s.d. (*n* = 3).**

**
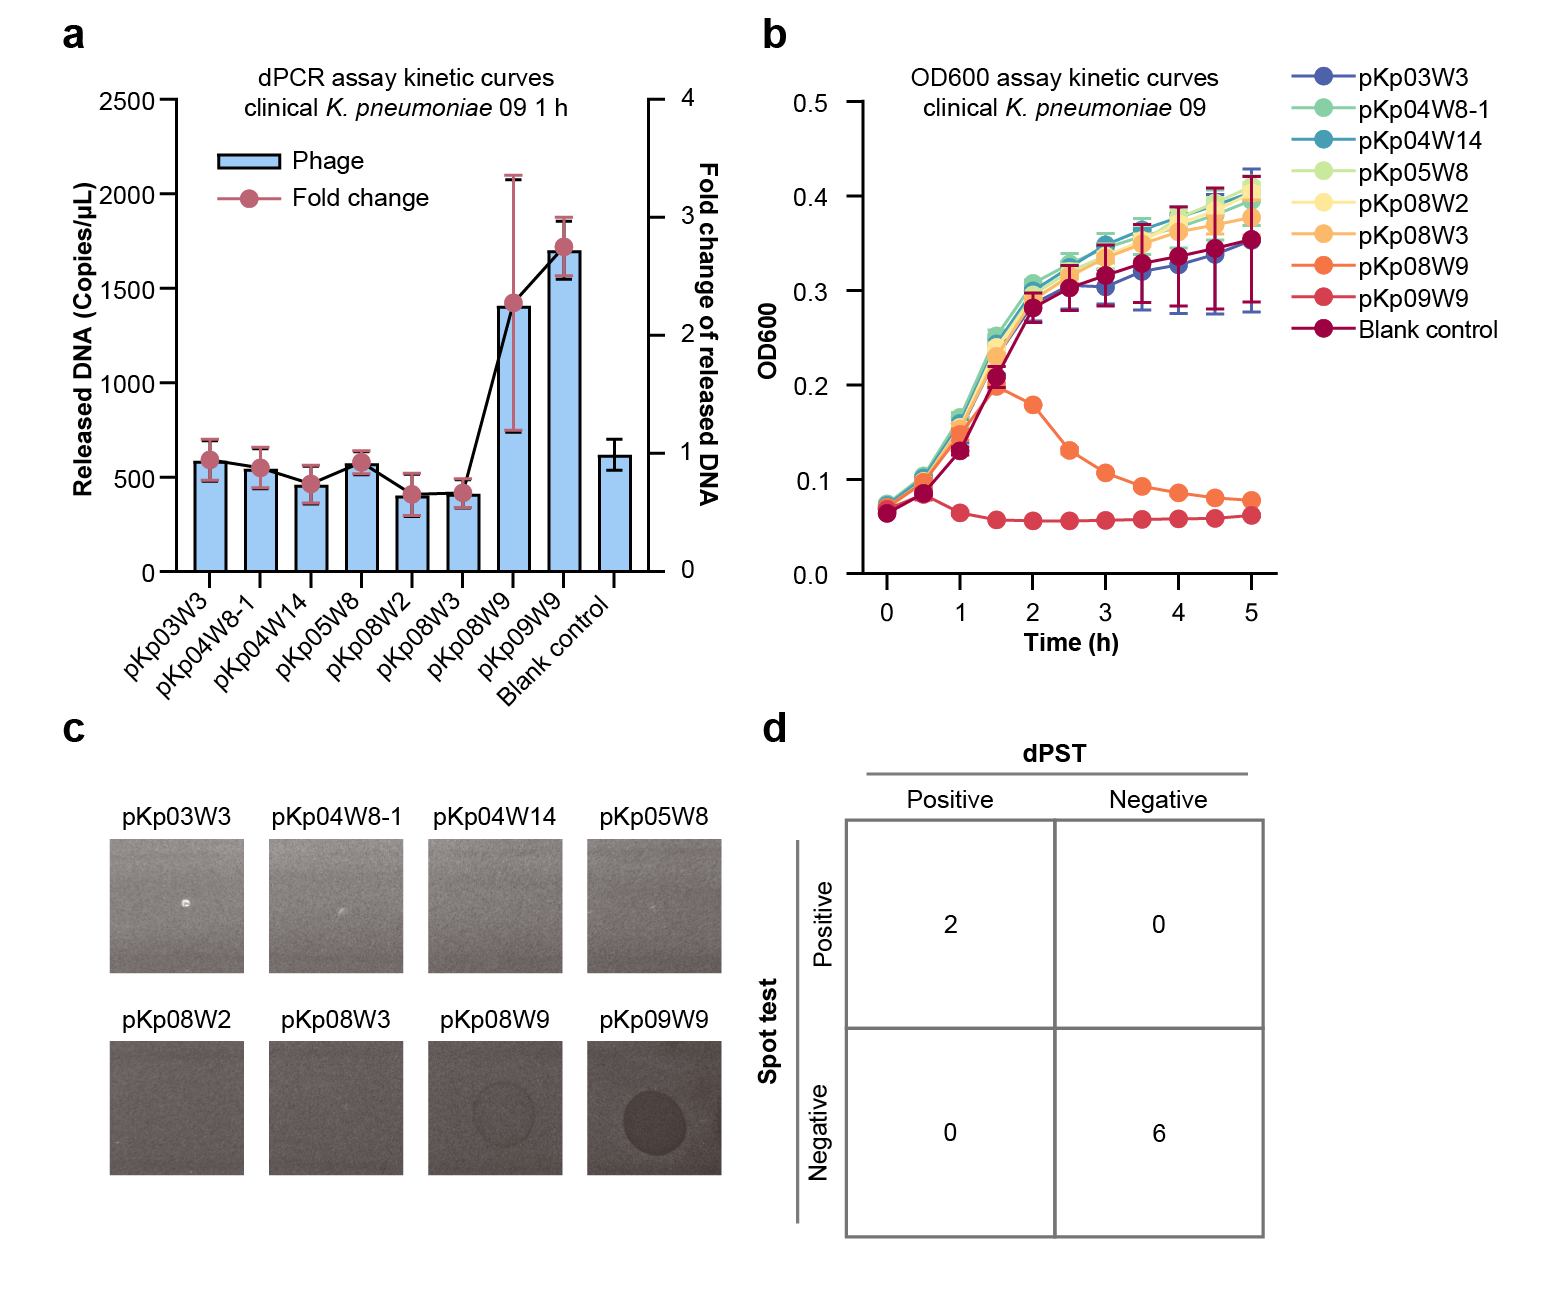
**

**Supplementary Fig. 16. Comparative profiling of phage–host interactions for clinical *K. pneumoniae* isolate Kpn09.**

****a,** dPST quantification of released genomic DNA (blue bars) and corresponding fold-change values (red line) following 30 min of phage co-incubation. **b,** Real-time bacterial growth kinetics (OD600) monitored over 5 h. **c,** Representative spot test images determining lytic phenotypes. **d,** Consistency matrix comparing dPST classifications with spot test outcomes. Data represent mean** ± **s.d. (*n* = 3).**
