# Supplementary material
Source: Research Square preprint supplement (doi:10.21203/rs.3.rs-8591046/v1)
Supplement: Supplementary file 2 [file 5f8113787866e2d150022de7.xlsx]

## Sheet: Strains
Bacterial strain	Description	Figure(s)	Source
E. coli K-12 MG1655	common E. coli laboratory strain (GenBank: NC_000913.3 / GCA_000005845.2)	2, 3, 4, S1, S4	CGSC (Coli Genetic Stock Center, Yale) / ATCC
E. coli DSM 13127	E. coli B strain; phage host (GenBank: GCA_000005845.2)	5, S7	DSMZ (German Collection of Microorganisms and Cell Cultures)
Acinetobacter baumannii ATCC19606	Type strain; multidrug-susceptible reference (GenBank: GCF_900011295.1)	S1	ATCC
Klebsiella pneumoniae ATCC10031	Virulent reference strain; capsule type K5	S1	ATCC
S. aureus ATCC29213	Biofilm-producing reference strain; Methicillin-sensitive (MSSA)	S1	ATCC
P. aeruginosa PAO1	Common laboratory reference strain (GenBank: NC_002516.2)	S1	DSMZ
E. cloacae CGMCC1.2022	Reference strain	S1	CGMCC
E. aerogenes CGMCC1.10716	Reference strain (Synonym: Klebsiella aerogenes)	S1	CGMCC
E. coli Ec9-1	Clinical isolate	5, S3, S5	Guangxin Luan’s lab at Non-coding RNA and Drug Discovery Key Laboratory of Sichuan Province, Chengdu Medical College
E. coli 25005	Clinical isolate	5, S6	Guangxin Luan’s lab at Non-coding RNA and Drug Discovery Key Laboratory of Sichuan Province, Chengdu Medical College
E. coli 64	Clinical isolate	5, S8	Guangxin Luan’s lab at Non-coding RNA and Drug Discovery Key Laboratory of Sichuan Province, Chengdu Medical College
Acinetobacter baumannii Aba03	Clinical isolate	5, S9	Yun Li’s lab at Institute of Clinical Pharmacology, Peking University First Hospital
Acinetobacter baumannii Aba22	Clinical isolate	5, S2	Yun Li’s lab at Institute of Clinical Pharmacology, Peking University First Hospital
Acinetobacter baumannii Aba33	Clinical isolate	5, S3, S10	Yun Li’s lab at Institute of Clinical Pharmacology, Peking University First Hospital
Acinetobacter baumannii Aba60	Clinical isolate	5, S3, S11	Yun Li’s lab at Institute of Clinical Pharmacology, Peking University First Hospital
Acinetobacter baumannii Aba111	Clinical isolate	5, S12	Yun Li’s lab at Institute of Clinical Pharmacology, Peking University First Hospital
Klebsiella pneumoniae Kpn03	Clinical isolate	S3	Jie Feng’s lab at Institute of Microbiology, Chinese Academy of Sciences (IMCAS)
Klebsiella pneumoniae Kpn04	Clinical isolate	5, S2, S13	Jie Feng’s lab at Institute of Microbiology, Chinese Academy of Sciences (IMCAS)
Klebsiella pneumoniae Kpn05	Clinical isolate	5, S14	Jie Feng’s lab at Institute of Microbiology, Chinese Academy of Sciences (IMCAS)
Klebsiella pneumoniae Kpn08	Clinical isolate	5, S15	Jie Feng’s lab at Institute of Microbiology, Chinese Academy of Sciences (IMCAS)
Klebsiella pneumoniae Kpn09	Clinical isolate	5, S16	Jie Feng’s lab at Institute of Microbiology, Chinese Academy of Sciences (IMCAS)
E. coli BW25113 (Vector)	Control strain (Parental strain for Keio collection)	6	Shu et al., 2024 (doi:10.1101/2024.12.27.630466)
E. coli BW25113 (Sir2-HerA+, WT)	Expressing wild-type Sir2-HerA defense system	6	Shu et al., 2024 (doi:10.1101/2024.12.27.630466)
E. coli BW25113 (Sir2-HerA-, mut)	Expressing inactive Sir2-HerA mutant	6	Shu et al., 2024 (doi:10.1101/2024.12.27.630466)
E. coli BW25113 (CRISPR+, targeting)	Expressing active CRISPR-Cas targeting phage	6	Shu et al., 2024 (doi:10.1101/2024.12.27.630466)
E. coli BW25113 (CRISPR-, non-targeting)	Expressing non-targeting CRISPR control	6	Shu et al., 2024 (doi:10.1101/2024.12.27.630466)
